# Supplementary material for: Spinocerebellar ataxia 38: structure–function analysis shows ELOVL5 G230V is proteotoxic, conformationally altered and a mutational hotspot
Source: PubMed Central journal article supplement (PMC10449689; doi:10.1007/s00439-023-02572-y), 2023-05-18
Supplement: 439_2023_2572_MOESM1_ESM.pdf [file 439_2023_2572_MOESM1_ESM.pdf]

## **Spinocerebellar ataxia 38: structure-function analysis shows ELOVL5 G230V is proteotoxic, conformationally altered and a mutational hotspot**

*Ferrero et al.*

### **Supplementary information**

Enza Ferrero<sup>1</sup>, Eleonora Di Gregorio<sup>2</sup>, Marta Ferrero<sup>3</sup>, Erika Ortolan<sup>1</sup>, Young-Ah Moon<sup>4</sup>, Antonella Di Campli<sup>5,6</sup>, Lisa Pavinato<sup>1</sup>, Cecilia Mancini<sup>1,7</sup>, Debasmitha Tripathy<sup>8</sup>, Marta Manes<sup>9</sup>, Eriola Hoxha<sup>10</sup>, Chiara Costanzi<sup>11</sup>, Elisa Pozzi<sup>1</sup>, Matteo Rossi Sebastiano<sup>12</sup>, Nico Mitro<sup>13</sup>, Filippo Tempia<sup>10</sup>, Donatella Caruso<sup>13</sup>, Barbara Borroni<sup>8</sup>, Manuela Basso<sup>9</sup>, Michele Salles<sup>14</sup>, Alfredo Brusco<sup>1,2</sup>

1. Department of Medical Sciences, University of Torino, Torino, Italy
2. Unit of Medical Genetics, Città della Salute e della Scienza Hospital, Torino, Italy
3. Experimental Zooprophyllactic Institute of Piedmont, Liguria & Aosta Valley, Torino, Italy
4. Department of Molecular Medicine, Inha University College of Medicine, Incheon, South Korea
5. Institute of Protein Biochemistry, Italian National Research Council, Napoli, Italy
6. Department of Innovative Technologies in Medicine and Dentistry, G. d'Annunzio University of Chieti-Pescara, Chieti, Italy
7. Genetics and Rare Diseases Research Division, Bambino Gesù Children's Hospital, Rome, Italy
8. Department of Clinical and Experimental Sciences, University of Brescia, Brescia, Italy
9. Department of Cellular, Computational and Integrative Biology, University of Trento, Trento, Italy Neuroscience Institute Cavalieri Ottolenghi, Orbassano and Department of Neuroscience, University of Torino, Torino, Italy
10. Department of Neurology, Cremona Hospital, Cremona, Italy
11. Department of Molecular Biotechnology and Health Sciences, University of Torino, Torino, Italy.
12. Department of Pharmacological and Biomolecular Sciences, University of Milan, Milan, Italy
13. Centre for Advanced Studies and Technology, G. d'Annunzio University of Chieti-Pescara, Chieti, Italy

The corresponding author is: Professor Alfredo Brusco, University of Torino, Department of Medical Sciences, Via Santena 19, 10126, Torino, Italy. Fax: +39 011 236 5926. Email: [alfredo.brusco@unito.it](mailto:alfredo.brusco@unito.it)

**Spinocerebellar ataxia 38: structure-function analysis shows ELOVL5 G230V is proteotoxic, conformationally altered and a mutational hotspot**

*Ferrero et al.*

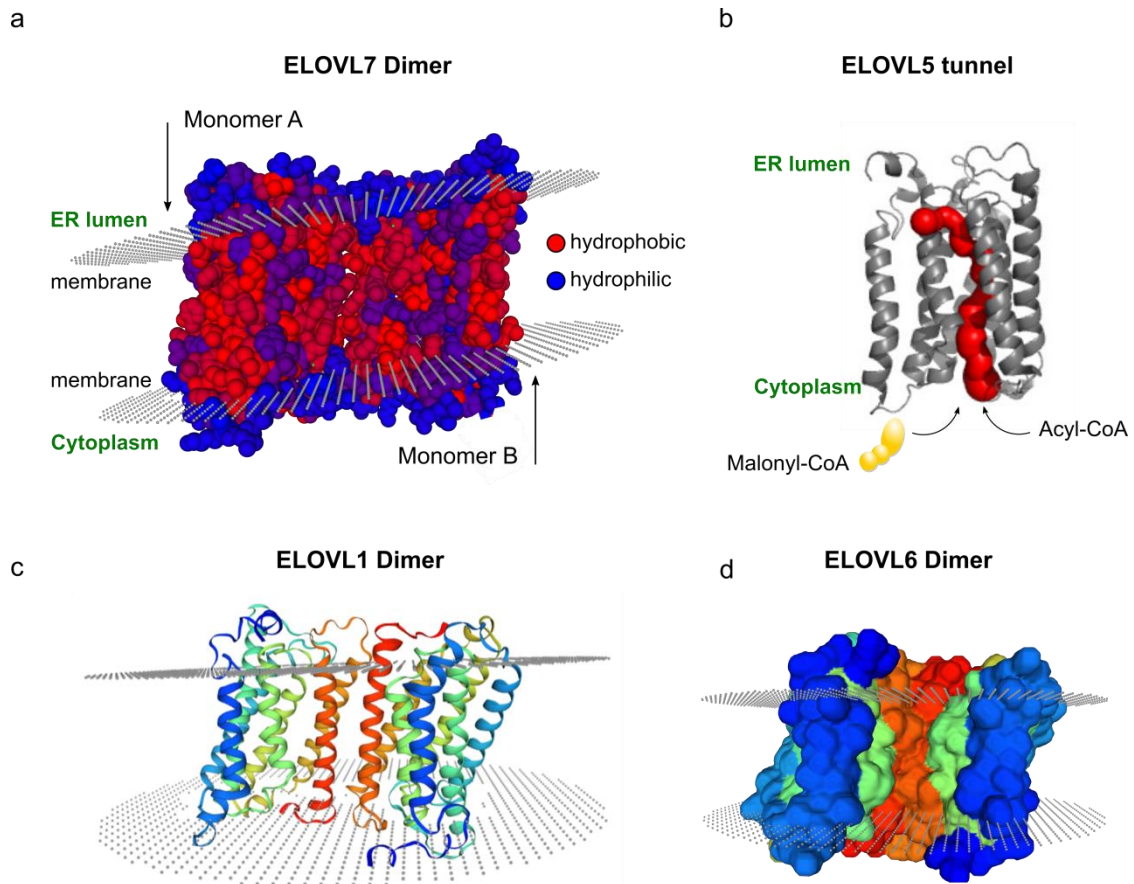

**Supplementary Figure 1**

**Suppl. Fig. 1.** Dimeric structure of human elongases. To date, three of the human elongases (ELOVL7, ELOVL1 and ELOVL6) are represented as homodimers in the Swiss-Model website (<https://swissmodel.expasy.org/>). (a) ELOVL7 homodimer (UniProtKB accession no. A1L3X0) is shown. Monomer A and B are represented in antiparallel array; hydrophobic or hydrophilic nature of the residues are indicated in this space-filling model. (b) Pore analysis of human ELOVL5 3D protein in PDBsum showing substrate-binding tunnel. The catalytic mechanism is a ping-pong type, two-step mechanism as described by Nie et al. (c) Cartoon model of ELOVL1 dimer (Q9BW60) with rainbow color scheme. (d) Surface model of ELOVL6 dimer (Q9H5J4) with rainbow color scheme.

**Spinocerebellar ataxia 38: structure-function analysis shows ELOVL5 G230V is proteotoxic, conformationally altered and a mutational hotspot**

*Ferrero et al.*

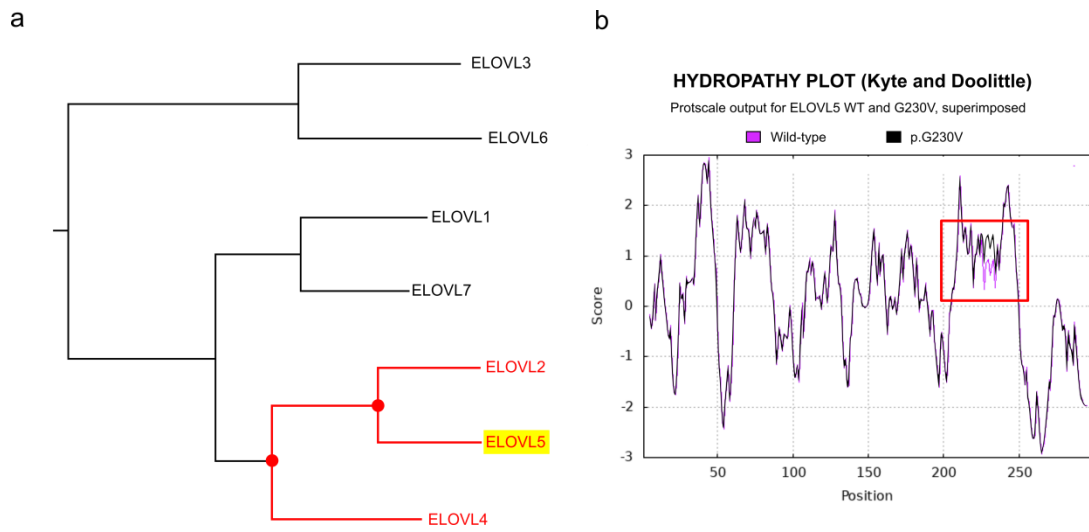

**Supplementary Figure 2**

**Suppl. Fig. 2.** (a) Neighbour-joining tree illustrating the phylogenetic relationship between the seven human ELOVL proteins. ELOVL2 and ELOVL4 proteins are the most closely related to ELOVL5, as highlighted by the red lines of the cladogram. The duplication nodes are indicated (●). Tree construction is detailed in the Materials and Methods. (b) Kyte-Doolittle hydropathy plot of wild-type (mauve line) and p.G230V (black line) ELOVL5 proteins showing increased hydrophobicity due to the G230V substitution.

**Spinocerebellar ataxia 38: structure-function analysis shows ELOVL5 G230V is proteotoxic, conformationally altered and a mutational hotspot**

Ferrero et al.

**Supplementary Figure 3**

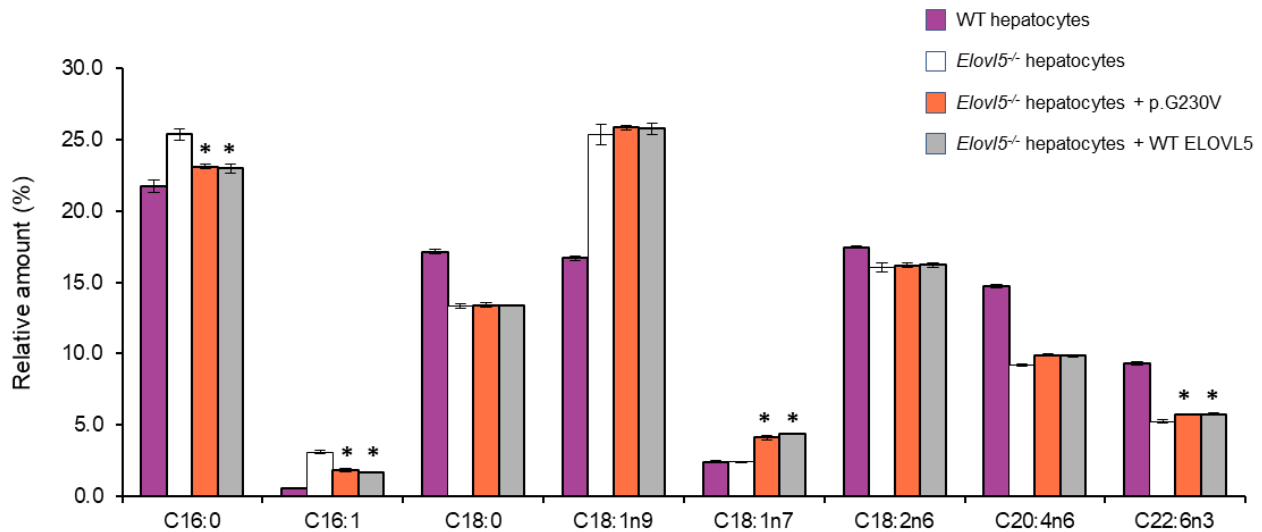

**Suppl. Fig. 3.** Similar lipid profiles in hepatocytes from *Elov15*<sup>-/-</sup> mice transfected with wild-type or variant ELOVL5. On day 0, primary hepatocytes were isolated from wild-type and *Elov15*<sup>-/-</sup> mice. Cells were attached for 4 h and then infected with adenovirus to express either wild-type ELOVL5 or ELOVL5 p.G230V. ELOVL5 substrate fatty acids were not added to the medium. On day 2, lipids were extracted from the cells and whole cell lysates were prepared for protein expression and lipid composition as described in Moon et al., 2009. \* indicates p<0.05 by Student t-test when comparing *Elov15*<sup>-/-</sup> hepatocytes and *Elov15*<sup>-/-</sup> hepatocytes + p.G230V or *Elov15*<sup>-/-</sup> hep+WT ELOVL5. No difference was detected when comparing *Elov15*<sup>-/-</sup> hepatocytes + p.G230V and *Elov15*<sup>-/-</sup> hepatocytes + WT ELOVL5.

**Spinocerebellar ataxia 38: structure-function analysis shows ELOVL5 G230V is proteotoxic, conformationally altered and a mutational hotspot**

*Ferrero et al.*

**Supplementary Table 1** Multiple sequence alignment of human ELOVL proteins

|        |                                                                 |
|--------|-----------------------------------------------------------------|
| ELOVL1 | ----MEA-----VVNLYQEVMKHADPRIQGYPLMGSPLLMTSILLTY                 |
| ELOVL7 | ----MAF-----SDLTSRTVHLYDNWIKDADPRVEDWLLMSSPLPQTILLGFY           |
| ELOVL2 | ----MEHL-----KAFDDEINAFLDNMFGPRDSRVRGWFMLDSYLPFTFFLTVMY         |
| ELOVL5 | ----MEH-----FDASLSTYFKALLGPRDTRVKGWFLLDNYIPTFICSVIY             |
| ELOVL4 | ----MGLLDSEPGSVLNVVSTALNDTVEFYRWTWSIADKRVENWPLMQSPWPTLSISTLY    |
| ELOVL3 | MVTAMNV-----SHEVNQLFQPYNFELS---KDMRPF-FEYEWATSFPIALIY           |
| ELOVL6 | ----MM-----SVLT---LQEYEFQKFNENEAIQW-MQENWKKSFLFSALY             |
|        | * : :                                                           |
| ELOVL1 | VYFVLSLGPRIANRKPQRLRGFMIVYNFSLVALSLY-----IVYEFLMSGWLSTYT        |
| ELOVL7 | VYFVTSLGPKLMENRKPFFELKKAMITYNFFIVLFSVY-----MCYEFVMSGWGIGYS      |
| ELOVL2 | LLSIW-LGNKYMKNRPAISLRGILTLYNLGITLLSAY-----MLAELILSTWEGGYN       |
| ELOVL5 | LLIIVW-LGPKYMRNKQPFSCRGILVVYNLGLTLLSLY-----MFCELVTVGWEGKYN      |
| ELOVL4 | LLFVW-LGPKWMDREPFQMRVLVLIYNFQGMVLLNLF-----IFRELFMGSYNAGYS       |
| ELOVL3 | LVLIA-VGQNYMKERKGFNLQGPLIILWSFCLAIFSIILGAVRMWIMGTVLLTGGLKQTV-   |
| ELOVL6 | AAFIF-GGRHLMNKRAKFEELRKLPLVLSLTLAVFSIFGALRTGAYMVYILMTKGLKQSV-   |
|        | : * . * . : : : : : : : : : : : :                               |
| ELOVL1 | WRCDPVDYSNSPEALRMVRVAWLFLFSKFIELMDTVIFILRKKDGQVTFLHVVFHHSVLPW   |
| ELOVL7 | FRCDIVDYSRSPTALRMARTCWLYYFSKFIELLDTIFFVLRKKNSQVTFLHVVFHHTIMPW   |
| ELOVL2 | LQCQDLTTSAGEA-DIRVAKVLWVWYFYSKSVFELDTIFFVLRKKTSQITFLHVYHHASMFN  |
| ELOVL5 | FFCQGTRTAGES-DMKIRVWLWVWYFYSKLIIEFMDTFFFILRKNNHQITVFLHVYHHASMLN |
| ELOVL4 | YICQSVSDYSNNVHEVRIAAALWVWYFVSKGVEYLDTVFFILRKKNNQVSVFLHVYHHCTMFT |
| ELOVL3 | --CFINFDNST---VKFWSWVFLSKVIELGDTAFIILRKR--PLIFLHWYHHSTVLV       |
| ELOVL6 | --CDQGFYNGPV---SKFWAYAFVLSKAPELGDTIFILRQ--KLIFLHWYHHITVLL       |
|        | * : : . ** * ** : : : ** . : . : * : ** :                       |
| ELOVL1 | SWWWGVKIAPGGMGSFHAMINSSVHVIMYLYYGLSAFGPVAQPYLWKKHMTAIQLIQFV     |
| ELOVL7 | TWWFVGVKFAAGGLGTFHALLNTAVHVMYSYYGLSALGPAYQKYLWKKYLTSLQLVQFV     |
| ELOVL2 | IWWCVLNIWPCGQSFPGPTLNSFIHILMYSYYGLSVF-PSMHKYLWKKYLTQAQLVQFV     |
| ELOVL5 | IWWFVMNVVPCGHSYFGATLNSFIHVLIMYSYYGLSSV-PSMRPYLWKKYITQGGQLLQFV   |
| ELOVL4 | LWWIGIKWVAGGQAFGAQLNSFIHVIMYSYYGLTAFGPWIQKYLWKKRYLTMLQLIQFH     |
| ELOVL3 | YTSFGYKKNKVPAGGWF-VTMNFGVHAIMYTYTLKAANVKPKML--PMLITSLQILQMF     |
| ELOVL6 | YSWYSYKDMVAGGWF-MTMNYGVHAVMYSYALRAAGFRVSRKF--AMFITLSQITQML      |
|        | : . . * : * : * : ** * * : : : * * : * :                        |
| ELOVL1 | LVSLHISQYYFM---SSCNYQYFVIVHILWIMYGTIFFMFLFSNFWYHSYTK---GKRLP--  |
| ELOVL7 | IVAIHISQFFFFM---EDCKYQFPVFACIIMSYSFMFLLLFLHFWYRAYTK---GQRLP--   |
| ELOVL2 | LTITHTMSAVVK---PCGFPGCLI-FQSSYMLTLVILFLNFIYVQTY-----RKKPMK      |
| ELOVL5 | LTIIQTSQCGVIW---PCTFPLGWLY-FQIGYMISLIALFTNFYIQTYNKKGASRRKDHL    |
| ELOVL4 | VTIGHTALSLEYT---DCFPFKWMHW-ALIAAISFIPLFLNFIYIRTYKE---PKKPKAG    |
| ELOVL3 | VGAIVSILTYIWRQDQCCHTMEHLFWSFILY-MTYFILFAHFFCQTYIR---PKVKA--     |
| ELOVL6 | MGCVVNYLVFCWMQHDCCHSHFQNIWFSSLMY-LSYLVLFCHFFFEAYI---GKMRK--     |
|        | : * * . ** : : : . : * :                                        |
| ELOVL1 | RALQONGAPGIA-----KVKAN                                          |
| ELOVL7 | KTVKN-----GTC-----KNKDN                                         |
| ELOVL2 | KDMQE--PPAGKEVKNKGFSAKAYFTAANGVMNK--KAQ--                       |
| ELOVL5 | KDHQN---GSMAAVNGHTNSFSPLENNVKPR--KLRKD                          |
| ELOVL4 | KTAMN----GISANGVSKSEKQLMIENGGKQKNGKAKGD                         |
| ELOVL3 | -----KTKSQ                                                      |
| ELOVL6 | -----TTKAE                                                      |
|        | . :                                                             |

Multiple sequence alignment of human ELOVL1-7 aligned by MAFFT online program. Cysteine residues that form the conserved intramolecular disulfide bond connecting Loop 2 and Loop 6 are colored in cyan. The catalytic histidine-rich active site is showed in yellow. The green column contains the ELOVL5 G230 residue that is substituted to V230 in SCA38. The output order reflects the results of the alignment. Sequence accession numbers are: ELOVL1 (Q9BW60.1)

**Spinocerebellar ataxia 38: structure-function analysis shows ELOVL5 G230V is proteotoxic, conformationally altered and a mutational hotspot**

*Ferrero et al.*

279aa; ELOVL2 (Q9NXB9.2) 296aa; ELOVL3 (Q9HB03.2) 270aa; ELOVL4 (Q9GZR5.1) 314aa; ELOVL5 (Q9NYP7.1) 299aa; ELOVL6 (Q9H5J4.1) 265aa; ELOVL7 (A1L3X0.1) 281aa.

**Supplementary Table 2** Percent of amino acid sequence identity and similarity between the human ELOVL proteins

Amino Acid Identity (%)

|               |               |               |               |               |               |               |               |
|---------------|---------------|---------------|---------------|---------------|---------------|---------------|---------------|
| <b>ELOVL1</b> | 100           |               |               |               |               |               |               |
| <b>ELOVL2</b> | 32.61         | 100           |               |               |               |               |               |
| <b>ELOVL3</b> | 25.55         | 22.59         | 100           |               |               |               |               |
| <b>ELOVL4</b> | 41.21         | 41.21         | 25.18         | 100           |               |               |               |
| <b>ELOVL5</b> | 35.12         | 57.09         | 24.44         | 41.13         | 100           |               |               |
| <b>ELOVL6</b> | 23.77         | 21.88         | 45.66         | 23.77         | 22.26         | 100           |               |
| <b>ELOVL7</b> | 57.34         | 38.07         | 24.44         | 44.48         | 36.29         | 26.79         | 100           |
|               | <b>ELOVL1</b> | <b>ELOVL2</b> | <b>ELOVL3</b> | <b>ELOVL4</b> | <b>ELOVL5</b> | <b>ELOVL6</b> | <b>ELOVL7</b> |

Amino Acid Similarity (%)

|               |               |               |               |               |               |               |               |
|---------------|---------------|---------------|---------------|---------------|---------------|---------------|---------------|
| <b>ELOVL1</b> | 100           |               |               |               |               |               |               |
| <b>ELOVL2</b> | 45.16         | 100           |               |               |               |               |               |
| <b>ELOVL3</b> | 36.29         | 35.18         | 100           |               |               |               |               |
| <b>ELOVL4</b> | 51.61         | 54.05         | 38.14         | 100           |               |               |               |
| <b>ELOVL5</b> | 47.31         | 68.24         | 39.25         | 53.84         | 100           |               |               |
| <b>ELOVL6</b> | 35.09         | 34.71         | 56.22         | 35.84         | 36.98         | 100           |               |
| <b>ELOVL7</b> | 69.53         | 45.55         | 36.29         | 54.44         | 45.19         | 38.49         | 100           |
|               | <b>ELOVL1</b> | <b>ELOVL2</b> | <b>ELOVL3</b> | <b>ELOVL4</b> | <b>ELOVL5</b> | <b>ELOVL6</b> | <b>ELOVL7</b> |

The percent amino acid identity and similarity were calculated using the SIAS programme as detailed in the methods.

## Spinocerebellar ataxia 38: structure-function analysis shows ELOVL5 G230V is proteotoxic, conformationally altered and a mutational hotspot

*Ferrero et al.*

### Supplementary Table 3 Links or addresses of webservers/databases used in this study

|                                                |                                                                                                                                     |
|------------------------------------------------|-------------------------------------------------------------------------------------------------------------------------------------|
| Ataxia website:                                | <a href="https://neuromuscular.wustl.edu/ataxia/domatax.html">https://neuromuscular.wustl.edu/ataxia/domatax.html</a>               |
| NCBI PDB structure database:                   | <a href="https://www.ncbi.nlm.nih.gov/structure/">https://www.ncbi.nlm.nih.gov/structure/</a>                                       |
| NCBI Protein sequence database                 | <a href="https://www.ncbi.nlm.nih.gov/protein/">https://www.ncbi.nlm.nih.gov/protein/</a>                                           |
| Mafft protein sequence alignment and tree      | <a href="https://mafft.cbrc.jp/alignment/server/">https://mafft.cbrc.jp/alignment/server/</a>                                       |
| SIAS percent aa sequence identity & similarity | <a href="http://imed.med.ucm.es/Tools/sias.html">http://imed.med.ucm.es/Tools/sias.html</a>                                         |
| Pfam protein family database                   | <a href="https://www.ebi.ac.uk/interpro/">https://www.ebi.ac.uk/interpro/</a>                                                       |
| Protter proteoform visualization               | <a href="https://wlab.ethz.ch/protter/start/">https://wlab.ethz.ch/protter/start/</a>                                               |
| Phyre2 protein modelling                       | <a href="http://www.sbg.bio.ic.ac.uk/~phyre2/html/page.cgi?id=index">http://www.sbg.bio.ic.ac.uk/~phyre2/html/page.cgi?id=index</a> |
| UCSF Chimera protein modelling                 | <a href="https://www.cgl.ucsf.edu/chimera/">https://www.cgl.ucsf.edu/chimera/</a>                                                   |
| I-Mutant protein stability predictor           | <a href="https://folding.biofold.org/i-mutant/i-mutant2.0.html">https://folding.biofold.org/i-mutant/i-mutant2.0.html</a>           |
| MAESTRO protein stability predictor            | <a href="https://biwww.che.sbg.ac.at/">https://biwww.che.sbg.ac.at/</a>                                                             |
| INPS-MD prediction server                      | <a href="https://inpsmd.biocomp.unibo.it/welcome/default/index">https://inpsmd.biocomp.unibo.it/welcome/default/index</a>           |
| SAAFEC-SEQ stability predictor                 | <a href="http://compbio.clemson.edu/SAAFEC-SEQ/">http://compbio.clemson.edu/SAAFEC-SEQ/</a>                                         |
| I-Tasser protein modelling                     | <a href="https://zhanggroup.org/I-TASSER/">https://zhanggroup.org/I-TASSER/</a>                                                     |
| Swiss Model protein modelling                  | <a href="https://swissmodel.expasy.org/">https://swissmodel.expasy.org/</a>                                                         |
| AlphaFold Protein Structure Database           | <a href="https://alphafold.ebi.ac.uk/">https://alphafold.ebi.ac.uk/</a>                                                             |
| Kyte & Doolittle Hydropathy plot               | <a href="https://web.expasy.org/protscale/">https://web.expasy.org/protscale/</a>                                                   |
| Human genomic variant search engine            | <a href="https://varsome.com">https://varsome.com</a>                                                                               |
| PDBsum protein structure database              | <a href="http://www.ebi.ac.uk/thornton-srv/databases/pdbsum/">http://www.ebi.ac.uk/thornton-srv/databases/pdbsum/</a>               |

**Spinocerebellar ataxia 38: structure-function analysis shows ELOVL5 G230V is proteotoxic, conformationally altered and a mutational hotspot**

*Ferrero et al.*

**Supplementary Table 4** ELOVL5 Protein sequences used to generate the MSA

|    | <b>Accession no.</b> | <b>Species</b>                               | <b>Length<br/>(Amino acids)</b> |
|----|----------------------|----------------------------------------------|---------------------------------|
| 1  | Q9NYP7.1             | <i>Homo sapiens</i> (Human)                  | 299                             |
| 2  | NP_599016.2          | <i>Mus musculus</i> (Mouse)                  | 299                             |
| 3  | NP_599209.1          | <i>Rattus norvegicus</i> (Rat)               | 299                             |
| 4  | NP_001040062.1       | <i>Bos taurus</i> (Bovine)                   | 299                             |
| 5  | NP_001186126.1       | <i>Gallus gallus</i> (Chicken)               | 295                             |
| 6  | NP_001011248.1       | <i>Xenopus tropicalis</i> (Frog)             | 295                             |
| 7  | NP_001306343.1       | <i>Macaca fascicularis</i> (Macaque)         | 299                             |
| 8  | NP_001130024.1       | <i>Salmo salar</i> (Salmon)                  | 294                             |
| 9  | NP_001290303.1       | <i>Larimichthys crocea</i> (Croaker)         | 294                             |
| 10 | NP_001297348.1       | <i>Anas platyrhynchos</i> (Duck)             | 295                             |
| 11 | XP_036724720.1       | <i>Balaenoptera musculus</i> (Blue whale)    | 299                             |
| 12 | XP_036269542.1       | <i>Pipistrellus kuhlii</i> (Bat)             | 299                             |
| 13 | XP_007892243.1       | <i>Callorhynchus milii</i> (Elephant shark)  | 290                             |
| 14 | XP_020389096.1       | <i>Rhincodon typus</i> (Whale shark)         | 293                             |
| 15 | AFR36912.1           | <i>Esox lucius</i> (Pike)                    | 295                             |
| 16 | NP_956747.1          | <i>Danio rerio</i> (Zebrafish)               | 291                             |
| 17 | JAV42152.1           | <i>Castor canadensis</i> (Beaver)            | 299                             |
| 18 | BBL33563.1           | <i>Hypoclinemus mentalis</i> (Sole)          | 294                             |
| 19 | XP_037750142.1       | <i>Chelonia mydas</i> (Turtle)               | 295                             |
| 20 | XP_037638316.1       | <i>Sebastes umbrosus</i> (Rockfish)          | 294                             |
| 21 | XP_037375770.1       | <i>Talpa occidentalis</i> (Mole)             | 299                             |
| 22 | XP_037248229.1       | <i>Falco rusticolus</i> (Falcon)             | 295                             |
| 23 | XP_037015462.1       | <i>Artibeus jamaicensis</i> (Fruit bat)      | 299                             |
| 24 | XP_017512380.2       | <i>Manis javanica</i> (Pangolin)             | 299                             |
| 25 | XP_036772263.1       | <i>Manis pentadactyla</i> (Chinese pangolin) | 299                             |
| 26 | KAF7246807.1         | <i>Varanus komodoensis</i> (Komodo dragon)   | 295                             |
| 27 | XP_027457290.1       | <i>Zalophus californianus</i> (Sea lion)     | 298                             |
| 28 | XP_035256991.1       | <i>Anguilla anguilla</i> (Eel)               | 296                             |
| 29 | XP_033874880.1       | <i>Acipenser ruthenus</i> (Sturgeon)         | 294                             |
| 30 | XP_019805339.1       | <i>Tursiops truncatus</i> (dolphin)          | 295                             |



**Spinocerebellar ataxia 38: structure-function analysis shows ELOVL5 G230V is proteotoxic, conformationally altered and a mutational hotspot**

Ferrero et al.

**Supplementary Table 5** CLUSTAL format alignment by MAFFT (v7.490) of **ELOVL5** proteins

```
HumanElov15      --MEHFDASLSTYFKALLGPRDTRVKGWFLLDNYIPTFICSVIYLLIVVLGPKYMRNKQP
Macaca.NP_00130 --MEHFDASLSTYFKALLGPRDTRVKGWFLLDNYIPTFICSVIYLLIVVLGPKYMRNKQP
SeaLion.XP_0274  --MENFDASLSTYFKALLGPRDTRVKGWFLLDNYIPTFICSVIYLLIVVLGPKYMRNKQP
Bat.XP_03626954 --MEHFDASLSTYFKALLGPRDTRVKGWFLLDNYIPTFICSTIYLLIVVLGPKYMRNKQP
FruitBat.XP_037  --MENFDASLSTYFKAWLGPDRTRVKGWFLLDNYIPTFICSVIYLLIVVLGPKYMRNKQP
Mouse.NP_599016 --MEHFDASLSTYFKAFGLGPRDTRVKGWFLLDNYIPTFVCSVIYLLIVVLGPKYMRNKQP
Rat.NP_599209.1 --MEHFDASLSTYFRALLGPRDTRVKGWFLLDNYIPTFVCSAIYLLIVVLGPKYMRNKQP
Beaver.JAV42152 --MENFDASLSTYFRAWLGPDRTRVKGWFLLDNYIPTFVCSVIYLLIVVLGPKYMRNKQP
Pangolin.XP_017  --MENFDASLSTYFKALLGPRDTRVKGWFLLDNYIPTFICSVIYLLIVVLGPKYMRNKQP
ChPangolin.XP_0  --MENFDASLSTYFKALLGPRDTRVKGWFLMDNYIPTFICSVIYLLIVVLGPKYMRNKQP
Mole.XP_0373757  --MENFDASLSTYFKALLGPRDTRVKGWFLLDNYIPTFICSVIYLLIVVLGPKYMRNKQA
Bos.NP_00104006 --MEHFDASLSTYFRAWLGPDRTRVEGWFLLDNYVPTLVCSILYLLIVVLGPKYMRNKQP
BlueWhale.XP_03  --MEHFDASLSTYFQALLGPRDLRVKGWFLLDNYIPTLLCSILYLLIVVLGPKYMRNKRP
Dolphin.XP_0198  --MEHFDASLSTYFQALLGPRDPRVKGWFLLDNYIPTLLCSILYLLIVVLGPKYMRNKRP
Gallus.NP_00118  --MERLDKTIINSYLDVWLGPRDPRVKGWLLLDNYPTTFIFSVLYLLIVVLGPKYMRNKQP
Duck.NP_0012973  --MERLDKTIINSYLDVWLGPRDPRVKGWLLLDNYPTTFIFSVLYLLIVVLGPKYMRNKQP
Falcon.XP_03724  --MEFLDKTIINSYLDVWLGPRDPRVKGWLLLDNYPTTFIFSVLYLLIVVLGPKYMRNKQP
Turtle.XP_03775  --MESLDQTIINSYLDVWFGPRDPRVKGWLLLDNYIPTTFIFSVLYLLIVVLGPKYMRNKQP
Komodo.KAF72468  --MESLDKTIINSYLDVWLGPRDPRVKGWLLLDNYPTTFIFSVLYLLIVVLGPKYMRNKQP
Xenopus.NP_0010  --MEVLDKAVNGYIDHLLGPKDPRVRGWLLLDNYVPTILFTALYLFIVWRGPKYMRNKRP
Salmo.NP_001130  --MEAFNHKLNTYIDSWMGPRDERVQGWLLLDNYPTTFALTMVYLLIVVLGPKYMRNRQP
Pike.AFR36912.1  --METFNQRLNTYIDSWMGPRDPRVKGWLLLDNYPTTFALTVIYLLIVVWAGPKYMRNRQP
Croaker.NP_0012  --METFNHKLNTYIDSWMGPRDQVRGWLLLDNYPTTFALTMVYLLIVVWAGPKYMRNRQP
Rockfish.XP_037  --METFNHKLNTYIDSWMGPRDQVRGWLLLDNYPTTFALTMVYLLIVVWAGPKYMRNRQP
AmSole.BBL33563  --METFNHKLNTYIDSWMGPRDQVRGWLLLDNYPTTFALTMVYLLIVVWAGPKYMRNRQP
Eel.XP_03525699  MDMEMFNHKLNTYIDSWMGPRDQVRGWLLLDNYPTTFALTMVYLLIVVWAGPKYMRNRQP
Sturgeon.XP_033  --MEALNQATNAYIDSWMGPRDTRVRGWFLLDNYPTTFVTVVLLYLFVWVWAGPKYMRNKQP
Zebrafish.NP_95  --METFSHRVNSYIDSWMGPRDLRVGTGWFLLDNYIPTTFIFVTVVYLLIVVWAGPKYMRNRQA
Eshark.XP_00789  --MGFADQTLNSYFDSWFGPRDPRVEGFLLLDNYPTTFLLTLIYLFVWVWAGPKYMRNKAP
WhaleShark.XP_0  --MEAVDRTLNYFVSWFGPRDSRVEGFLLDKYPTTFILSLLYLFVWVWAGPKYMRNKAP
      * . . . : : ** : * * * : * : . : * : * : * * : * : .

HumanElov15      FSCRGILVVYNLGLTLLSLYMFCELVTVGWEGKYNFFCQGTRTAGESDMKIIRVLWVWYF
Macaca.NP_00130  FSCRGILVVYNLGLTLLSLYMFCELVTVGWEGKYNFFCQGTRTAGESDMKIIRVLRWVYF
SeaLion.XP_0274  FSCRGILVLYNLGLTLLSLYMFCELVTVGWEGRYNFFCQGTRTAGESDMKIIRVLWVWYF
Bat.XP_03626954 LACRKILVVYNLGLTLLSLYMFCELVTVGWEGQYNFFCQGTRTAGESDMKIIRVLWVWYF
FruitBat.XP_037  FSCRGILVVYNLGLTLLSLYMFCELVTVGWEGKYNFFCQGTRTAGESDMKIIRVLWVWYF
Mouse.NP_599016 FSCRGILQLYNLGLTLLSLYMFCELVTVGWEGKYNFFCQGTRTAGESDMKIIRVLWVWYF
Rat.NP_599209.1 FSCRGILVVYNLGLTLLSLYMFCELVTVGWEGKYNFFCQGTRTAGESDMKIIRVLWVWYF
Beaver.JAV42152 FSCRGILVVYNLGLTLLSLYMFCELVTVGWEGKYNFFCQGTRTAGESDMKIIRVLRWVYF
Pangolin.XP_017  FSCRGILVVYNLGLTLLSLYMFCELVTVGWEGRYNFFCQGTRSSGEADVIVVLWVWYF
ChPangolin.XP_0  FSCRGILVVYNLGLTLLSLYMFCELVTVGWEGRYNFFCQGTRSSGEADVIVVLWVWYF
Mole.XP_0373757  FSCRGILVVYNLGLTLLSLYMFCELVTVGWEGKYNFFCQDTRTAGESDMKIIRVLRWVYF
Bos.NP_00104006 FSCRGILVVYNLGLTLLSLYMFCELVTVGWEGQYNFFCQGTRSSGEADMKIIRVLRWVYF
BlueWhale.XP_03  FSCRGILVVYNLGLTLLSLYMFCELVTVGWEGQYNFFCQGTRSSGEADMKIIRVLRWVYF
Dolphin.XP_0198 FSCRGILVLYNLGLTLLSLYMFCELVTVGWEGQYNFFCQGTRSSGEADMKIIRVLRWVYF
Gallus.NP_00118 FSCRGILVVYNLGLTLLSLYMFCELVTVGWEGGYNFYFCQDTHSGGEADMKIIRVLRWVYF
Duck.NP_0012973 FSCRGILVVYNLGLTLLSLYMFCELVTVGWEGGYNFYFCQDTHSGGEADMKIIRVLRWVYF
Falcon.XP_03724 FSCRGILVVYNLGLTLLSLYMFCELVTVGWEGGYNFYFCQDTHSGGEADMKIIRVLRWVYF
Turtle.XP_03775 FSCRGILVVYNVGLTLLSLYMFCELVTVGWEGGYNFYFCQDTHSGGEADMKIIRVLRWVYF
Komodo.KAF72468 FSCRGILVVYNLGLTLLSLYMFCELVTVGWEGGYNFYFCQDTHSGGEADMKIIRVLRWVYF
Xenopus.NP_0010 VSCRGILVVYNLGLTLLSLYMFCELVTVGWEGGYNFYFCQDTHSGGEADMKIIRVLRWVYF
Salmo.NP_001130 VSCQGLLVLYNLALTLTLLSFMFYEMVSAVWQGGYNFYFCQDTHSAGETDTKIINVLWVWYF
Pike.AFR36912.1 LSCRGFLVVYNLGLTLLSLYMFCELVTVGWEGGYNFYFCQDTHSAGETDTKIINVLWVWYF
Croaker.NP_0012 YSCRGLLVLYNLGLTLLSFMFYELVTVAVWHGGYNFYFCQDTHSAGETDTKIINVLWVWYF
Rockfish.XP_037 YSCRGLLVLYNLGLTLLSFMFYELVTVAVRHGGYNFYFCQDTHSAGETDTKIINVLWVWYF
AmSole.BBL33563 YSCRGLLVVYNLGLTLLSFMFYELVTVAVWHGGYNFYFCQDTHSAGETDTKIINVLWVWYF
Eel.XP_03525699 FSCRGLLVVYNLGLTLLSLYMFCELVNGMWQGGYNFYFCQDTHSAGETDTKIINVLWVWYF
Sturgeon.XP_033 FSCRGVLLVVYNLGLTLLSFMFYELVTVGAWQGGYNFYFCQDTHSGGEADMKIIRVLRWVYF
Zebrafish.NP_95 YSCRALLVLYNLGLTLLSFMFYELVTVGAWQGGYNFYFCQDTHSGGEADMKIIRVLRWVYF
Eshark.XP_00789 VSCRGTLVVYNLGLTLLSLYMFCELVTVGWEGGYNFYFCQDTHSAGKADLKIIRVLRWVYF
WhaleShark.XP_0 LSSRGILVVYNLGLTLLSLYMFCELVTVGWVWGGYNFYFCQDTHSAGKADLKIIRVLRWVYF
```

# Spinocerebellar ataxia 38: structure-function analysis shows ELOVL5 G230V is proteotoxic, conformationally altered and a mutational hotspot

Ferrero et al.

::: \* \*\*: \*:\*\*\*:\*\*\* \*: : . \* \* :\*: . . . \* :\*:\*\* \*\*\*\*

HumanElov15 SKLIEFMDTFFFILRKNNHQITVLHVYHHASMLNIWWFVMNWVPCGHSYFGATLNSFIHV  
Macaca.NP\_00130 SKLIEFMDTFFFILRKNNHQITVLHVYHHASMLNIWWFVMNWVPCGHSYFGATLNSFIHV  
SeaLion.XP\_0274 SKLIEFMDTFFFILRKNNHQITVLHVYHHASMLNIWWFVMNWVPCGHSYFGATLNSFIHV  
Bat.XP\_03626954 SKLIEFMDTFFFILRKNNHQITVLHVYHHASMLNIWWFVMNWVPCGHSYFGATLNSFIHV  
FruitBat.XP\_037 SKLIEFMDTFFFILRKNNHQVTVLHVYHHASMLNIWWFVMNWVPCGHSYFGATLNSFIHV  
Mouse.NP\_599016 SKLIEFMDTFFFILRKNNHQITVLHVYHHATMLNIWWFVMNWVPCGHSYFGATLNSFIHV  
Rat.NP\_599209.1 SKLIEFMDTFFFILRKNNHQITVLHVYHHATMLNIWWFVMNWVPCGHSYFGATLNSFIHV  
Beaver.JAV42152 SKLIEFMDTFFFILRKNNHQITVLHVYHHASMLNIWWFVMNWVPCGHSYFGATLNSFIHV  
Pangolin.XP\_017 SKLIEFMDTFFFILRKNNHQITVLHVYHHVSMMLNIWWFVMNWVPCGHSYFGATLNSFIHV  
ChPangolin.XP\_0 SKLIEFMDTFFFILRKNNHQITVLHVYHHVSMMLNIWWFVMNWVPCGHSYFGATLNSFIHV  
Mole.XP\_0373757 SKLIEFMDTFFFILRKNNHQITVLHVYHHASMLNIWWFVMNWVPCGHSYFGATLNSFIHV  
Bos.NP\_00104006 SKLIEFMDTFFFILRKNNHQITVLHVYHHASMLNIWWFVMNWVPCGHSYFGATLNSFIHV  
BlueWhale.XP\_03 SKLIEFMDTFFFILRKNNHQVTVLHVYHHASMLNIWWFVMNWVPCGHSYFGATLNSFIHV  
Dolphin.XP\_0198 SKLIEFMDTFFFILRKNYHQVTVLHVYHHASMLNIWWFVMNWVPCGHSYFGATLNSFIHV  
Gallus.NP\_00118 SKLIEFMDTFFFILRKNNHQITVLHVYHHATMLNIWWFVMNWVPCGHSYFGATLNSFIHV  
Duck.NP\_0012973 SKLIEFMDTFFFILRKNNHQITVLHVYHHATMLNIWWFVMNWVPCGHSYFGATLNSFIHV  
Falcon.XP\_03724 SKLIEFMDTFFFILRKNNHQITVLHVYHHATMLNIWWFVMNWVPCGHSYFGATLNSFIHV  
Turtle.XP\_03775 SKLIEFMDTFFFILRKNYHQITVLHVYHHASMLNIWWFVMNWVPCGHSYFGATLNSFIHV  
Komodo.KAF72468 SKLIEFMDTFFFILRKNNHQITVLHVYHHATMLNIWWFVMNWVPCGHSYFGATLNSFIHV  
Xenopus.NP\_0010 SKLIEFMDTFFFILRKNNHQITVLHVYHHASMLNIWWFVMNWVPCGHSYFGATLNSFIHV  
Salmo.NP\_001130 SKVIEFMDTFFFILRKNNHQITFLHYHHASMLNIWWFVMNWVPCGHSYFGASLNSFVHV  
Pike.AFR36912.1 SKLIEFMDTFFFILRKNNHQITFLHYHHASMLNIWWFVMNWVPCGHCYFGACLNSFIHV  
Croaker.NP\_0012 SKLIEFMDTFFFILRKNNHQITFLHYHHASMLNIWWFVMNWVPCGHSYFGASLNSFVHV  
Rockfish.XP\_037 SKLIEFMDTFFFIVRKNNHQITFLHYHHASMLNIWWFVMNWVPCGHSYFGASLNSFVHV  
AmSole.BBL33563 SKLIEFMDTFFFILRKNNHQITFLHYHHASMLNIWWFVMNWVPCGHSYFGASLNSFVHV  
Eel.XP\_03525699 SKLIEFMDTFFFILRKNNHQITFLHVYHHASMPSIWWFVMNWVPCGHSYFGASLNSFIHV  
Sturgeon.XP\_033 SKLIEFMDTFFFILRKNNHQITFLHVYHHATMPNIWWFVMNWVPCGHSYFGASFNFSFIHV  
Zebrafish.NP\_95 SKLIEFMDTFFFILRKNNHQITFLHVYHHATMLNIWWFVMNWVPCGHSYFGATLNSFIHV  
Eshark.XP\_00789 SKVIEFMDTFFFILRKNYHQITILHVYHHATMFNIWWFVMNWVPCGHSYFGATLNSFIHV  
WhaleShark.XP\_0 SKVIEFMDTFFFILRKNYHQITVLHVYHHATMFNIWWFVMNWVPCGHSYFGATLNSFIHV  
\*\*:\*:\*\*\*\*\*:\*\*\* :\*:\*\*:\*:\*\*\* :\* .\*\*\*\*\*:\*\*\*\* :\*\*\* :\*\*\*:\*\*\*

HumanElov15 LMYSYGLSSVPSMRPYLWKKYITQGQLLQFVLTIIQTS CGVIWPCFPLGWLYFQIGY  
Macaca.NP\_00130 LMYSYGLSSVPSMRPYLWKKYITQGQLLQFVLTIIQTS CGVIWPCFPLGWLYFQIGY  
SeaLion.XP\_0274 LMYSYGLSSVPSVRPYLWKKYITQGQLLQFVLTIIQTS CGVLWPCFPLGWLYFQIGY  
Bat.XP\_03626954 LMYSYGLSSVPSMRPYLWKKYITQGQLI QFVLTIIQTT CGVIWPCSFPLGWLYFQIGY  
FruitBat.XP\_037 LMYSYGLSSVPSMRPYLWKKYITQGQLLQFVLTIVQTS CGVWPCSFPLGWLYFQIGY  
Mouse.NP\_599016 LMYSYGLSSI PSMRPYLWKKYITQGQLVQFVLTIIQTT CGVFWPCSFPLGWLFQIGY  
Rat.NP\_599209.1 LMYSYGLSSVPSMRPYLWKKYITQGQLVQFVLTIIQTS CGVIWPCSFPLGWLYFQIGY  
Beaver.JAV42152 LMYSYGLSSVPSMRPYLWKKYITQGQLI QFVLTIIQTS CGVLWPCSFPLGWLYFQIGY  
Pangolin.XP\_017 LMYSYGLSSVPSMRPYLWKKYITQGQLLQFVLTIIQTS CGVWVPCFPLGWLYFQIGY  
ChPangolin.XP\_0 LMYSYGLSSVPSMRPYLWKKYITQGQLLQFVLTIIQTS CGVWPCAFPLGWLYFQIGY  
Mole.XP\_0373757 LMYSYALSSVPSMRPYLWKKYITQGQLLQFVLTIIQTT CGVIWRCFPLGWLYFQIGY  
Bos.NP\_00104006 LMYSYGLSSI PSMRPYLWKKYITQGQLLQFVLTIIQTS CGVIWPCFPLGWLYFQIGY  
BlueWhale.XP\_03 LMYSYGLSSVPSMRPYLWKKYITQGQLLQFVLTIIQTS CGVIWPCAFPLGWLYFQIGY  
Dolphin.XP\_0198 LMYSYGLSSVPSMRPYLWKKYITQGQLVQFVLTIIQTS CGVIWPCAFPLGWLYFQIGY  
Gallus.NP\_00118 LMYSYGLSAVPAMRPYLWKKYITQGQLI QFVLTIFQTS CGVWPCAFPLGWLYFQIFY  
Duck.NP\_0012973 LMYSYGLSAVPAMRPYLWKKYITQGQLTQFVLTIFQTS CGVWPCAFPLGWLYFQISY  
Falcon.XP\_03724 LMYSYGLSAVPAMRPYLWKKYITQGQLI QFVLTIFQTS CGVWPCAFPLGWLYFQISY  
Turtle.XP\_03775 LMYSYGLSAIPAMRPYLWKKYITQGQLI QFVLTIFQTS CGVWPCAFPLGWLYFQIFY  
Komodo.KAF72468 LMYSYGLSAIPSMRPYLWKKYITQGQLI QFVLTIFQTS CGVWPCFPLGWLYFQIGY  
Xenopus.NP\_0010 LMYSYGLSAIPAMRPYLWKKYITQ CQLTQFVLTMTQTTCAMIWPCFPMGWLYFQNCY  
Salmo.NP\_001130 LMYSYGLSAVPAIRPYLWKKYITQGQLI QFFLTMSQTI CAVIWPCGFPFGWLFQIFY  
Pike.AFR36912.1 LMYSYGLSAIPTMRPYLWKKYITQGQLI QFFLTMTQTI CAVIWPCGFPFGWLYFQISY  
Croaker.NP\_0012 VMYSYGLSAIPAMRPYLWKKYITQ LQLTQFFLTMSQTLCAVWPCGFPFGWLYFQISY  
Rockfish.XP\_037 VMYSYGLSAIPAIRPYLWKKYITQ FQLI QFFLTMTQTMCAVWPCGFPFGWLSFQISY  
AmSole.BBL33563 VMYSYGLSAIPAMRPYLWKKYITQ LQLI QFFLTVSHTMCAVIWPCGFPFGWLFQISY  
Eel.XP\_03525699 LMYSYGLSAVPALRPYLWKKYITQ GQLI QFVMTMTQTS CAVWPCGFPFGWLYFQISY  
Sturgeon.XP\_033 LMYSYGLSAIPAVRPYLWKKYITQ GQLI QFVLTMTQTTCAVFRPCGFPFGWLYFQICY  
Zebrafish.NP\_95 LMYSYGLSAVPALRPYLWKKYITQ GQLVQFVLTMTQTS CAVWPCGFPFGWLYFQISY  
Eshark.XP\_00789 LMYSYGLSAIPAMRPYLWKKYITQ GQLLQFVMTIIQTS FGVWPCGFPFGWLYFQIGY

# Spinocerebellar ataxia 38: structure-function analysis shows ELOVL5 G230V is proteotoxic, conformationally altered and a mutational hotspot

Ferrero et al.

```
WhaleShark.XP_0 LMYSYYGLSAIPAMRPLYLWKKYITQGGQLLQFVLTIIQTSFGVIWPCGFPSGWL YFQIGY
:*****.**:::*****:**** * * *.:* : * .:. * * * * * * * *
HumanElov15 MISLIALFTNFYIQTYNKKGASRRKDHLKDHQNGSMAAVNGHTNSFSPLENNVKPRKLRK
Macaca.NP_00130 MISLIALFTNFYIQTYNKKGASRRKDHLKDHQNGSVAAVNGHTNSFSPLENNVKPRKLRK
SeaLion.XP_0274 MISLITLFTNFYVQTYNKKGASRRKEHLKDHQNGSVAAVNGHTNSF-SLENNVKPRKQQRK
Bat.XP_03626954 MISLITLFTNFYIQTYNKKGASRRKEHLKDHQNGSLTAANGHTNSFSLENNVKLRKQQRK
FruitBat.XP_037 MISLILFTNFYIQTYNKKGASRRKERLRDHQNGSVTAANGHTNSFSLSLGNSTKPRKQQRK
Mouse.NP_599016 MISLIALFTNFYIQTYNKKGASRRKDHLKGHQNGSVAAVNGHTNSFPSENVKPRKQQRK
Rat.NP_599209.1 MISLIALFTNFYIQTYNKKGASRRKEHLKGHQNGSMTAVNGHTNNFASLENSVTSRKQQRK
Beaver.JAV42152 MISLIALFTNFYIQTYNKKGASRRDHLKDHQNGSATVNGHTNTFSSLENNVKPRKQQRK
Pangolin.XP_017 MISLIVLFTNFYVQTYNKKGASRRREYLKDHQNGSMAAMNGHAGSFSSLSGSAKPRKLRK
ChPangolin.XP_0 MISLIVLFTNFYVQTYNKKGASRRREYLKDHQNGSMAAVNGHAGSFSSLSGNSVKPRKLRK
Mole.XP_0373757 MISLITLFTNFYIQTYNKKGASRRKEHLKEHQNGSVAAVNGHTNSFSTLENNVKLRKQQRK
Bos.NP_00104006 MISLITLFTNFYIQTYNKKGVSRREHQKDHQNGSVAAVNGHISSFSLENNVKPRKQQRK
BlueWhale.XP_03 MISLIALFTNFYIQTYNKKGASRRREHQKDHQNGSVTAVNGHTSSFSLENNVKPRKQQRK
Dolphin.XP_0198 MISLIALFTNFYIQTYNKKGASRRRE----HQNGSVTAVNGHTSSFSLEHNSVKPRKQQRK
Gallus.NP_00118 MISLILFTNFYIQTYNKKASRRKE----YQNGSTATVNGYTNSFSLENNVKQQRKQQRK
Duck.NP_0012973 MISLILFTNFYIQTYNKKASRRKE----YQNGSAATVNGYTNSFSLENNVKQQRKQQRK
Falcon.XP_03724 MISLILFTNFYIQTYNKKASRRKE----YQNGSTATVNGYTNSSSSLENNVKQQRKQQRK
Turtle.XP_03775 MISLILFTNFYIQTYKKKASRRKE----YQNGSTAANGYTNSFSLENNVKQQRKQQRK
Komodo.KAF72468 MITLILFTNFYIQTYNKKAAACRRKE----YQNGSTAANGYTNSFSLENNVKQQRKQQRK
Xenopus.NP_0010 MISLILFGNFYIKTYNKKTSRRKE----YQNGSASAVNGHTNSFSLEDNVVKQQRKQQRK
Salmo.NP_001130 MASLIAFFSNFYIQTYKKHRVSQKEY----HQNGSVDSLNGHANGVTPTE-TITHRKVRV
Pike.AFR36912.1 MVTLIALFSNFYIQTYKKRSVSQKKEC----HRNGSASPLNGHVSGVTPTE-TITHRKVRA
Croaker.NP_0012 MVTLIFLFSNFYVQTYKKHSVSLKKE----HQNGSPVSTNGHANGTPSLE-HAAHKKLRV
Rockfish.XP_037 MVTLIFLFSNFYIQAYKKHSGSLKKE----HQNGSPISTNGHANGTPSME-RTAYQKLRM
AmSole.BBL33563 MVTLILFSNFYIQTYQKHSRSLQKD----HRNGSPASRNHANGKPSAE-QPAHKKLRV
Eel.XP_03525699 MVTLIALFSNFYIQTYQKQGAFFRRKE----HQNGSAAAMNGHNSNGVSPAELDLTRKLRV
Sturgeon.XP_033 LIVLIVLFSNFYIQTYKKRGSRRKE----CQNGSAAASLNGHANGVSSVD-NVTQRKLRK
Zebrafish.NP_95 MVTLILFSNFYIQTYKKRSGRKSD----YPNGS---VNGHTNGVMSSE-KIKHRKARA
Eshark.XP_00789 MISLIVLFTNFYIQTYQKKSASRTKD----CLNGS---ANGHTNGFSAQTDHYSAKKTH-
WhaleShark.XP_0 MISLILFTNFYIQTYKKKSAFKSKD----CLNGSTIAANGHTNGLSTQMDHYSEKKTTH-
: ** :* *****:*** ** : . . :* :
```

```
HumanElov15 D
Macaca.NP_00130 D
SeaLion.XP_0274 D
Bat.XP_03626954 D
FruitBat.XP_037 D
Mouse.NP_599016 D
Rat.NP_599209.1 D
Beaver.JAV42152 D
Pangolin.XP_017 D
ChPangolin.XP_0 D
Mole.XP_0373757 D
Bos.NP_00104006 D
BlueWhale.XP_03 D
Dolphin.XP_0198 D
Gallus.NP_00118 D
Duck.NP_0012973 D
Falcon.XP_03724 D
Turtle.XP_03775 D
Komodo.KAF72468 D
Xenopus.NP_0010 D
Salmo.NP_001130 D
Pike.AFR36912.1 D
Croaker.NP_0012 D
Rockfish.XP_037 D
AmSole.BBL33563 D
Eel.XP_03525699 D
Sturgeon.XP_033 D
Zebrafish.NP_95 D
Eshark.XP_00789 -
WhaleShark.XP_0 -
```

**Spinocerebellar ataxia 38: structure-function analysis shows ELOVL5 G230V is proteotoxic, conformationally altered and a mutational hotspot**

*Ferrero et al.*

**Supplementary Table 6** ELOVL2 Protein sequences for Multiple Sequence Alignment

|    | <b>Accession no.</b> | <b>Species</b>                                  | <b>Length<br/>(AA)</b> |
|----|----------------------|-------------------------------------------------|------------------------|
| 1  | Q9NXB9.2             | <i>Homo sapiens</i> (Human)                     | 296                    |
| 2  | XP_028703673.1       | <i>Macaca mulatta</i> (Rhesus macaque)          | 296                    |
| 3  | NP_062296.1          | <i>Mus musculus</i> (Mouse)                     | 292                    |
| 4  | XP_032740498.1       | <i>Rattus norvegicus</i> (Rat)                  | 296                    |
| 5  | XP_027380089.1       | <i>Bos indicus</i> x <i>Bos taurus</i> (Bovine) | 294                    |
| 6  | NP_001184237.1       | <i>Gallus gallus</i> (Chicken)                  | 297                    |
| 7  | NP_001016159.1       | <i>Xenopus tropicalis</i> (Frog)                | 296                    |
| 8  | NP_001130025.1       | <i>Salmo salar</i> (Salmon)                     | 287                    |
| 9  | XP_027307376.1       | <i>Anas platyrhynchos</i> (Duck)                | 296                    |
| 10 | XP_007900820.1       | <i>Callorhynchus milii</i> (Elephant shark)     | 300                    |
| 11 | XP_036725964.1       | <i>Balaenoptera musculus</i> (Blue whale)       | 295                    |
| 12 | AGR34076.1           | <i>Oncorhynchus masou</i> (Cherry salmon)       | 287                    |
| 13 | XP_005162628.1       | <i>Danio rerio</i> (Zebrafish)                  | 295                    |
| 14 | ETE65396.1           | <i>Ophiophagus hannah</i> (King cobra)          | 301                    |
| 15 | XP_036301996.1       | <i>Pipistrellus kuhlii</i> (Bat)                | 296                    |

**Spinocerebellar ataxia 38: structure-function analysis shows ELOVL5 G230V is proteotoxic, conformationally altered and a mutational hotspot**

*Ferrero et al.*

**Supplementary Table 7** MSA of ELOVL5 (30 sequences) and ELOVL2 (15 Sequences)

CLUSTAL format alignment by MAFFT (v7.505) Blosum 62/L-INS-i/Gap open penalty 1.53

```

HumanElov15 -----MEHFDASLSTYFKALLGPRDRVKGWFLLDNYIPTFICSVIYLLIVWLGPKY
Macaca.NP_00130 -----MEHFDASLSTYFKALLGPRDRVKGWFLLDNYIPTFICSVIYLLIVWLGPKY
SeaLion.XP_0274 -----MENFDASLSTYFKALLGPRDRVKGWFLLDNYIPTFICSVIYLLIVWLGPKY
Bat.XP_03626954 -----MEHFDASLSTYFKALLGPRDRVKGWFLLDNYIPTFICSTIYLLIVWLGPKY
FruitBat.XP_037 -----MENFDASLSTYFKAWLGPDRVKGWFLLDNYIPTFICSVIYLLIVWLGPKY
Mouse.NP_599016 -----MEHFDASLSTYFKAFLLGPRDRVKGWFLLDNYIPTFVCSVIYLLIVWLGPKY
Rat.NP_599209.1 -----MEHFDASLSTYFRALLGPRDRVKGWFLLDNYIPTFVCSAIYLLIVWLGPKY
Beaver.JAV42152 -----MENFDASLSTYFRAWLGPDRVKGWFLLDNYIPTFVCSVIYLLIVWLGPKY
Pangolin.XP_017 -----MENFDASLSTYFKALLGPRDRVKGWFLLDNYIPTFICSVIYLLIVWLGPKY
ChPangolin.XP_0 -----MENFDASLSTYFKALLGPRDRVKGWFLMDNYIPTFICSVIYLLIVWLGPKY
Mole.XP_0373757 -----MENFDASLSTYFKALLGPRDRVKGWFLLDNYIPTFICSVIYLLIVWLGPKY
Bos.NP_00104006 -----MEHFDASLSTYFRAWLGPDRVEGWFLLDNYVPTLVCSILYLLIVWLGPKY
BlueWhale.XP_03 -----MEHFDASLSTYFQALLGPRDLRVKGWFLLDNYIPTLLCSILYLLIVWLGPKY
Dolphin.XP_0198 -----MEHFDASLSTYFQALLGPRDRVKGWFLLDNYIPTLLCSILYLLIVWLGPKY
Gallus.NP_00118 -----MERLDKTINSYLDVWLGPRDRVKGWLLLENYPTTFIFSVLYLLIVWLGPKY
Duck.NP_0012973 -----MERLDKTINSYLDVWLGPRDRVKGWLLLENYPTTFIFSVLYLLIVWLGPKY
Falcon.XP_03724 -----MEFLDKTINSYLDVWLGPRDRVKGWLLLENYPTTFIFSVLYLLIVWLGPKY
Turtle.XP_03775 -----MESLDQTINSYLDVWFGPRDRVKGWLLLDNYIPTFIFSVLYLLIVWLGPKY
Komodo.KAF72468 -----MESLDKTINSYLDVWLGPRDRVKGWLLLDNYPTTFIFSVLYLLIVWLGPKY
Xenopus.NP_0010 -----MEVLDKAVNGYIDHLLGPKDPRVRGWLLLDNYVPTILFTALYLFIVWRGPKY
Salmo.NP_001130 -----MEAFNHKLNTYIDSWMGPRDERVQGWLLLDNYPTTFALTMYLLIVWLGPKY
Pike.AFR36912.1 -----METFNQRNLNTYIDSWMGPRDERVRGWLLLDNYPTTFALTMYLLIVWAGPKF
Croaker.NP_0012 -----METFNHKLNTYLESWVGPRDQVRGWLLLDNYPTTFALTVMYLLIVWVGPKY
Rockfish.XP_037 -----METFNHRLNTYLESWVGPRDQVRGWLLLDNYPTTFALTMYLLIVWVGPKY
AmSole.BBL33563 -----METFNHKLNTYIDSWLGPDRQVRGWLLLDNYPTTFALTVMYLLIVWLGPKY
Eel.XP_03525699 -----MD-MEMFNHRLNTYIDSWMGPRDQVRGWLLLDNYPTTFALTVMYLLIVWVGPKY
Sturgeon.XP_033 -----MEALNQATNAYIDSWMGPRDRVRGWFLLDNFSPTVVLTLTYLFFVWVGPKY
Zebrafish.NP_95 -----METFSHRVNSYIDSWMGPRDLRVTGWFLLDNYIPTFIFTVMYLLIVWVGPKY
Eshark.XP_00789 -----MGFADQTLNSYFDNSWFGPRDRVEGFLLLDNYPTFLLTLTYLFFVWVGPKY
WhaleShark.XP_0 -----MEAVDRTLNYYFVSWFGPRDRSRVEGFLLDKYPTFILLSLTYLFFVWVGPKY
Macaca.XP_02870 -----MEHLKAFDDEINAFLDNMFGRDRSRVWGFMLDSYLPTFFLTVIYLLSIWLGPKY
Human.sp|Q9NXXB9 -----MEHLKAFDDEINAFLDNMFGRDRSRVWGFMLDSYLPTFFLTVMYLLSIWLGPKY
XP_036301996.1 -----MELLKAFDDKINAFLDNMFGRDRSRVWGFMLDSYLPTFFSLTVMYLLSIWLGPKY
Bos.XP_02738008 -----MEHLKAFDDEVNAFLDNMFGRDRSRVWGFMLDSYLPTFFSLTVLYLLSIWLGPKY
Bwhale.XP_03672 -----MEHLKAFDDEINAFLDNMFGRDRSRVWGFMLDSYLPTFFSLTVLYLLSIWLGPKY
Rat.XP_03274049 -----MEQLKAFDNEVNAFLDNMFGRDRSRVWGFLLDSYLPTFTLTITMYLLSIWLGPKY
Mouse.NP_062296 -----MEQLKAFDNEVNAFLDNMFGRDRSRVWGFLLDSYLPTFILTITTYLLSIWLGPKY
Gallus.NP_00118 -----MEHLKAFDQEVNAFVDYMFGRDARVRGWLLLDNYLPTFFLTVAYLLCIWLGPKY
Duck.XP_0273073 -----MEHLKAFDQEVNAFVDYMFGRDRSRVWGFLLDSYLPTFFLTCAYLLCIWLGPKY
Frog.NP_0010161 -----MEHIEKIDQEVNAFVDYLFGRDTRTRGWMLLDNYLPTFFLTLTYLFLSIWLGPKY
Shark.XP_007900 M MPTVANQIETLDRKRVNSFVDYMFGRDRSRVWGFMLDSYLPTFFLTLTYLFLSIWLGPKY
ETE65396.1 -----MEHIEKIDQEVNAFVDYLFGRDTRTRGWMLLDNYLPTFFLTLTYLFLSIWLGPKY
Salmo.NP_001130 -----MNHLQSLDERLNKLFYFLFEDRDRSRVWGFLLDSYLPTLSLTIYLLSVYLGSKY
Cherry -----MNHLQSLDERLNALFYFLFEDRDRSRVWGFLLDSYLPTLSLTIYLLSVYLGSKY
Zebrafish.XP_00 -----MESYEKIDKLLNSVVDLSLFGDRDRSRVWGFLLDSYPTFFLTIYLLSVYLGSKY
: : * * . * : : : : . : * * . : * : . : : *

```

```

HumanElov15 MRNKQPFSCRGILVVYNLGLTLLSLYMFCE-----LVTGVWEG
Macaca.NP_00130 MRNKQPFSCRGILVVYNLGLTLLSLYMFCE-----LVTGVWEG
SeaLion.XP_0274 MKNRQPFSCRGILVLYNLGLTLLSLYMFCE-----LVKGVWEG
Bat.XP_03626954 MKNRQPLACRKILVVYNLGLTLLSLYMFCE-----LVTGVWEG
FruitBat.XP_037 MKNRQPFSCRGILVVYNLGLTLLSLYMFCE-----LVTGVWEG
Mouse.NP_599016 MKNRQPFSCRGILQLYNLGLTLLSLYMFYE-----LVTGVWEG
Rat.NP_599209.1 MKNRQPFSCRGILVVYNLGLTLLSLYMFYE-----LVTGVWEG
Beaver.JAV42152 MKNRQPFSCRGILVVYNLGLTLLSLYMFYE-----LVTGVWEG
Pangolin.XP_017 MKNRQPFSCRGILVVYNLGLTLLSLYMFYE-----LVTGVWEG
ChPangolin.XP_0 MKNRQPFSCRGILVVYNLGLTLLSLYMFYE-----LVTGVWEG
Mole.XP_0373757 MKNRQAFSCRGILVVYNLGLTLLSLYMFCE-----LVTGVWEG
Bos.NP_00104006 MKTRQPFSCRGILVVYNLGLTLLSLYMFCE-----LVTGVWEG
BlueWhale.XP_03 MKNRPPFSCRGILVVYNLGLTLLSLYMFCE-----LVTGVWEG
Dolphin.XP_0198 MKNRPPFSCRGILVLYNLGLTLLSLYMFCE-----LVTGVWEG
Gallus.NP_00118 MRNKQPFSCRGILVVYNLGLTLLSLYMFYE-----LVTGVWEG

```

**Spinocerebellar ataxia 38: structure-function analysis shows ELOVL5 G230V is proteotoxic, conformationally altered and a mutational hotspot**

*Ferrero et al.*

```
Duck.NP_0012973 MRNKQPFSCRGILVVYNLGLTLLSLYMFYE-----LVTGVWEG
Falcon.XP_03724 MRNKQPFSCRGILVVYNLGLTLLSLYMFYE-----LVTGVWEG
Turtle.XP_03775 MQNKQPFSCRGILVVYNVGLTLLSLYMFYE-----LVTGVWEG
Komodo.KAF72468 MQKRPPFSCRGILVVYNLGLTLLSLYMFYE-----LVTGVWEG
Xenopus.NP_0010 MQNRPPVSCRGILVVYNLGLTLLSLYMFYE-----LVTGVWEG
Salmo.NP_001130 MRHRQPVSCQGLLVLYNLALTLLSFYMFYE-----MVASVWQG
Pike.AFR36912.1 MRHRQPLSCRGFLVVYNLGLALLSLYMFSE-----MVASVWVG
Croaker.NP_0012 MKHRQPYSCRGLLVLYNLGLTLLSFYMFYE-----LVTAVWHG
Rockfish.XP_037 MKHRQPYSCRGLLVLYNLGLTLLSFYMFYE-----LVS AVRHG
AmSole.BBL33563 MKHRQPYSCRGLLVVYNLGLTLLSFYMFYE-----LVGAVWHG
Eel.XP_03525699 MKNRQPFSCRGLLVVYNLGLTLLSMYFCE-----LVNGMWQG
Sturgeon.XP_033 MKNKEPFSCRGLVVVYNLGLTLLSFYMFYE-----LVNGAWQG
Zebrafish.NP_95 MKNRQAYSCRALLVPYNLCLTLLSLYMFYE-----LVMSVYQG
Eshark.XP_00789 MKNKAPVSCRGTLVVYNI GLTLLSLYMFYE-----LLTGVWEG
WhaleShark.XP_0 MQNKAPLSSRGILVVYNI GLTLLSLYMFCE-----LVRGVWDG
Macaca.XP_02870 MKNRPALSLRGILTLYNLGITLLSAYMLAE-----LILSTWEG
Human.sp|Q9NXB9 MKNRPALSLRGILTLYNLGITLLSAYMLAE-----LILSTWEG
XP_036301996.1 MKNRPALSLRSILTLYNLGITLLSMYMLAE-----LILSTWEG
Bos.XP_02738008 MRNRPALSLRGILTLYNLGITLLSAYMLAE-----LILSSWEG
Bwhale.XP_03672 MRSRAALSLRGILTLYNLGITLLSAYMLAE-----LILSSWEG
Rat.XP_03274049 MKNRPALSLRGILTLYNLGITLLSAYMLVE-----LVLSSWEG
Mouse.NP_062296 MKNRPALSLRGILTLYNLAITLLSAYMLVE-----LILSSWEG
Gallus.NP_00118 MKNRQPFSLKAHLIVYNLGITLLSLYMLIE-----LILATWEG
Duck.XP_0273073 MKNRPPFSLRAHLIVYNLGITLLSMYMLIE-----LILATWEG
Frog.NP_0010161 MQNRPAFSLRGHLIVYNLVVTLLSLYMLIE-----LILSTWEG
Shark.XP_007900 MKDRPAFFLRTHLIIYNLGVMLLSYMFIE-----LILSSWEG
ETE65396.1 MKNRPALSLRGLLIVYNFVTVLSFYMLIEVRLNRRILNFLFLAFYSADWDLILATWEG
Salmo.NP_001130 MRNRPAYSLKGVLVQVYNFVVTMLSLYMLVE-----LVSATLSA
Cherry MRNRPAYSLKGVLVQVYNFVVTMLSLYMLVE-----LVLATLSA
Zebrafish.XP_00 MRNRPAYSLKNVLLLYNFVTVLSFYMLVE-----LISAVWSA
*: : . : * *. : : ** *: *
```

```
HumanElovl5 KYNFFCQGTRTAGESDMKI IRVLWVWYFYSKLIIEFMDTFFFILRKNNHQITVLHVYHHAS
Macaca.NP_00130 KYNFFCQGTRTAGESDMKI IRVLRWYFYSKLIIEFMDTFFFILRKNNHQITVLHVYHHAS
SeaLion.XP_0274 RYNFFCQGTRSAGEADMKI IRVLWVWYFYSKLIIEFMDTFFFILRKNNHQITVLHVYHHAS
Bat.XP_03626954 QYNFFCQGTRSAGEADMKI IRVLWVWYFYSKLIIEFMDTFFFILRKNNHQITVLHVYHHAS
FruitBat.XP_037 KYNFFCQGTRSAGEADMKI IRVLWVWYFYSKLIIEFMDTFFFILRKNNHQITVLHVYHHAS
Mouse.NP_599016 KYNFFCQGTRSAGESDMKI IRVLWVWYFYSKLIIEFMDTFFFILRKNNHQITVLHVYHHATM
Rat.NP_599209.1 KYNFFCQGTRSAGESDMKIVRVLWVWYFYSKLIIEFMDTFFFILRKNNHQITVLHVYHHATM
Beaver.JAV42152 KYNFFCQGTRSAGESDMKI IQVLWVWYFYSKLIIEFMDTFFFILRKNNHQITVLHVYHHAS
Pangolin.XP_017 RYNFFCQGTRSSGADVIVRVLWVWYFYSKLIIEFMDTFFFILRKNNHQITVLHVYHHVSM
ChPangolin.XP_0 RYNFFCQGTRSSGADVIVRVLWVWYFYSKLIIEFMDTFFFILRKNNHQITVLHVYHHVSM
Mole.XP_0373757 KYNFFCQDTRSAGEADMKI IHVLWVWYFYSKLIIEFMDTFFFILRKNNHQITVLHVYHHAS
Bos.NP_00104006 QYNFFCQGTRSGEADMKI IRVLWVWYFYSKLIIEFMDTFFFILRKNNHQITVLHVYHHAS
BlueWhale.XP_03 QYNFFCQGTRSRGADMKI IRVLWVWYFYSKLIIEFMDTFFFILRKNNHQITVLHVYHHAS
Dolphin.XP_0198 QYNFFCQGTRSGEADMKI IRVLWVWYFYSKLIIEFMDTFFFILRKNYHQITVLHVYHHAS
Gallus.NP_00118 GYNFYCQDTHSGEADMKI IRVLWVWYFYSKLIIEFMDTFFFILRKNNHQITVLHVYHHATM
Duck.NP_0012973 GYNFFCQDTHSGEADMKI IRVLWVWYFYSKLIIEFMDTFFFILRKNNHQITVLHVYHHATM
Falcon.XP_03724 GYNFFCQDTHSGEADMKI IRVLWVWYFYSKLIIEFMDTFFFILRKNNHQITVLHVYHHATM
Turtle.XP_03775 GYNFFCQDTHSGEADMKI IRVLWVWYFYSKLIIEFMDTFFFILRKNHYQITVLHVYHHAS
Komodo.KAF72468 GYNFFCQDTHSGEADMKI IRVLWVWYFYSKLIIEFMDTFFFILRKNNHQITVLHVYHHATM
Xenopus.NP_0010 GYNFFCQDTHSGGDADTKI IRVLWVWYFYSKLIIEFMDTFFFILRKNNHQITVLHVYHHAS
Salmo.NP_001130 GYNFYCQDTHSAGETDTKI INVLWVWYFYSKLVIEFMDTFFFILRKNNHQITFLHIYHHAS
Pike.AFR36912.1 GYHFYCQDTRSAGEADTRI IHVLWVWYFYSKLIIEFMDTFFFILRKNNHQITFLHIYHHAS
Croaker.NP_0012 GYNFYCQDIHSAQEVNDKI INVLWVWYFYSKLIIEFMDTFFFILRKNNHQITFLHIYHHAS
Rockfish.XP_037 GYNFYCQDTHSAQEVNDKIMNVLWVWYFYSKLIIEFMDTFFFIVRKNNHQITFLHIYHHAS
AmSole.BBL33563 DYNFYCQNTHSAPVDKVINVLWVWYFYSKLIIEFMDTFFFILRKNNHQITFLHIYHHAS
Eel.XP_03525699 NYNFFCQDTHSAGEADTKI INVLWVWYFYSKLIIEFMDTFFFILRKNNHQITFLHVYHHAS
Sturgeon.XP_033 GYNFFCQDTHSGEADMKI IRVLWVWYFYSKLIIEFMDTFFFILRKNNHQITFLHVYHHATM
Zebrafish.NP_95 GYNFFCQNTHSGGDADNRMMNVLWVWYFYSKLIIEFMDTFFFILRKNNHQITFLHVYHHATM
Eshark.XP_00789 GYSIFCQDTHSAGADLKI IRVLWVWYFYSKLVIEFMDTFFFILRKNYHQITILHVYHHATM
WhaleShark.XP_0 GYSIFCQNTHNAGEADLKI IRVLWVWYFYSKLVIEFMDTFFFILRKNYHQITVLHVYHHATM
Macaca.XP_02870 GYNLQCQDLTSAGEADIRVAKVLWVWYFYSKSVEFLDTIFFVLRKKTSSQITFLHVYHHAS
Human.sp|Q9NXB9 GYNLQCQDLTSAGEADIRVAKVLWVWYFYSKSVEFLDTIFFVLRKKTSSQITFLHVYHHAS
XP_036301996.1 GYNLQCQDLASAGEADVIRVAKVLWVWYFYSKLIIEFLDTIFFVLRKKTSSQITFLHVYHHAS
```

# Spinocerebellar ataxia 38: structure-function analysis shows ELOVL5 G230V is proteotoxic, conformationally altered and a mutational hotspot

Ferrero et al.

```
Bos.XP_02738008 GYNLQCQDLTSAGEADIRVARVLWVWYFYSKLIIEFLDTIFFVLRKKTSQVTFVLHVVYHHAS  
Bwhale.XP_03672 GYNLQCQDLTSAGEADIRVAGVLWVWYFYSKLIIEFLDTIFFVLRKKTSQITFLHVVYHHAS  
Rat.XP_03274049 GYNLQCQNLDSAGEGDIRVAKVLWVWYFYSKLVIEFLDTIFFVLRKKTSQITFLHVVYHHAS  
Mouse.NP_062296 GYNLQCQNLDSAGEGDIRVAKVLWVWYFYSKLVIEFLDTIFFVLRKKTNQITFLHVVYHHAS  
Gallus.NP_00118 GYNLQCQNLHSAAGEADIRVAKVLWVWYFYSKVIEFADTIFVLRKKSSQITFLHVVYHHATM  
Duck.XP_0273073 GYNLQCQNLHSAAGAADIRVAKVLWVWYFYSKVIEFMDTIFVLRKKSSQITFLHVVYHHATM  
Frog.NP_0010161 GYNLQCQNLDSAGKADVRVAKVLWVWYFYSKAEIEFMDTIFVLRKKNSQITFLHVVYHHAS  
Shark.XP_007900 AYYLQCQNLHSAAGEVDIRVAKVLWVWYFYSKAVEFMDTIFVLRKKNSQITFLHVVYHHATM  
ETE65396.1 NYNLQCQNLISAGETDIRVARVLWVWYFYSKVIEFADTVFVLRKKNSQITFLHVVYHHATM  
Salmo.NP_001130 GYRLQCQGLHEAGEADLRVAKVLWVWYFYSKVIEFLDTIFFVLRKKNSQITFLHVVYHHAS  
Cherry GYRLQCQGLHEAGEADLRVAKVLWVWYFYSKVIEFLDTIFFVLRKKNSQITFLHVVYHHAS  
Zebrafish.XP_00 GYRLQCQALDEVGEADIRVAKVLWVWYFYSKLIIEFLDTIFFVLRKKNSQITFLHVVYHHAS  
* : ** * :: ** ***** :** **.*::** : *::**.***.***.***
```

```
HumanElovl5 LNIWWFVMNWVPCGHSYFGATLNSFIHVLMSYYGLSSVPSMRPYLWVWKKYITQGQLLQF  
Macaca.NP_00130 LNIWWFVMNWVPCGHSYFGATLNSFIHVLMSYYGLSSVPSMRPYLWVWKKYITQGQLLQF  
SeaLion.XP_0274 LNIWWFVMNWVPCGHSYFGATLNSFIHVLMSYYGLSSVPSVRPYLWVWKKYITQGQLLQF  
Bat.XP_03626954 LNIWWFVMNWVPCGHSYFGATLNSFIHVLMSYYGLSSVPSMRPYLWVWKKYITQGQLLQF  
FruitBat.XP_037 LNIWWFVMNWVPCGHSYFGATLNSFIHVLMSYYGLSSVPSMRPYLWVWKKYITQGQLLQF  
Mouse.NP_599016 LNIWWFVMNWVPCGHSYFGATLNSFIHVLMSYYGLSSVPSMRPYLWVWKKYITQGQLVQF  
Rat.NP_599209.1 LNIWWFVMNWVPCGHSYFGATLNSFIHVLMSYYGLSSVPSMRPYLWVWKKYITQGQLVQF  
Beaver.JAV42152 LNIWWFVMNWVPCGHSYFGATLNSFIHVLMSYYGLSSVPSMRPYLWVWKKYITQGQLLQF  
Pangolin.XP_017 LNIWWFVMNWVPCGHSYFGATLNSFIHVLMSYYGLSSVPSMRPYLWVWKKYITQGQLLQF  
ChPangolin.XP_0 LNIWWFVMNWVPCGHSYFGATLNSFIHVLMSYYGLSSVPSMRPYLWVWKKYITQGQLLQF  
Mole.XP_0373757 LNIWWFVMNWVPCGHSYFGATLNSFIHVLMSYYALSSVPSMRPYLWVWKKYITQGQLLQF  
Bos.NP_00104006 LNIWWFVMNWVPCGHSYFGATLNSFIHVLMSYYGLSSVPSMRPYLWVWKKYITQGQLLQF  
BlueWhale.XP_03 LNIWWFVMNWVPCGHSYFGATLNSFIHVLMSYYGLSSVPSMRPYLWVWKKYITQGQLLQF  
Dolphin.XP_0198 LNIWWFVMNWVPCGHSYFGATLNSFIHVLMSYYGLSSVPSMRPYLWVWKKYITQGQLVQF  
Gallus.NP_00118 LNIWWFVMNWVPCGHSYFGATLNSFIHVLMSYYGLSAVPAMRPYLWVWKKYITQGQLLQF  
Duck.NP_0012973 LNIWWFVMNWVPCGHSYFGATLNSFIHVLMSYYGLSAVPAMRPYLWVWKKYITQGQLTQF  
Falcon.XP_03724 LNIWWFVMNWVPCGHSYFGATLNSFIHVLMSYYGLSAVPAMRPYLWVWKKYITQGQLLQF  
Turtle.XP_03775 LNIWWFVMNWVPCGHSYFGATLNSFIHVLMSYYGLSAIPAMRPYLWVWKKYITQGQLLQF  
Komodo.KAF72468 LNIWWFVMNWVPCGHSYFGATLNSFIHVLMSYYGLSAIPAMRPYLWVWKKYITQGQLLQF  
Xenopus.NP_0010 LNIWWFVMNWVPCGHSYFGATLNSFIHVLMSYYGLSAIPAMRPYLWVWKKYITQCQLTQF  
Salmo.NP_001130 LNIWWFVMNWVPCGHSYFGASLNSFVHVLMSYYGLSAIPAIRPYLWVWKKYITQGQLLQF  
Pike.AFR36912.1 LNIWWFVMNWVPCGHCFYFACLNSFIHVLMSYYGLSAIPTMRPYLWVWKKYITQGQLLQF  
Croaker.NP_0012 LNIWWFVMNWVPCGHSYFGASLNSFVHVVMYSYYGLSAIPAMRPYLWVWKKYITQLQLTQF  
Rockfish.XP_037 LNIWWFVMNWVPCGHSYFGASLNSFVHVVMYSYYGLSAIPAIRPYLWVWKKYITQGQLLQF  
AmSole.BBL33563 LNIWWFVMNWI PCGHSFFGASLNSFVHVVMYSYYGLSAIPAMRPYLWVWKKYITQLQLLQF  
Eel.XP_03525699 PSIWWFVMNWVPCGHSYFGASLNSFIHVLMSYYGLSAVPALRPYLWVWKKYITQGQLLQF  
Sturgeon.XP_033 PNIWWFVMNWVPCGHSYFGASLNSFIHVLMSYYGLSAIPAVRPYLWVWKKYITQGQLLQF  
Zebrafish.NP_95 LNIWWFVMNWVPCGHSYFGATFNSFIHVLMSYYGLSAVPALRPYLWVWKKYITQGQLVQF  
Eshark.XP_00789 LNIWWFVMNWVPCGHSFFGATLNSFIHVLMSYYGLSAIPAMRPYLWVWKKYITQGQLLQF  
WhaleShark.XP_0 FNIWWFVMNWVPCGHSFFGATLNSFIHVLMSYYGLSAIPAMRPYLWVWKKYITQGQLLQF  
Macaca.XP_02870 FNIWWCVLNWI PCGQSFFGPTLNSFIHILMSYYGLSVFSPMHKYLWVWKKYLTQAQLVQF  
Human.sp|Q9NXB9 FNIWWCVLNWI PCGQSFFGPTLNSFIHILMSYYGLSVFSPMHKYLWVWKKYLTQAQLVQF  
XP_036301996.1 FNIWWCVLNWI PCGQSFFGPTLNSFIHILMSYYGLSVFSPMHKYLWVWKKYLTQAQLVQF  
Bos.XP_02738008 FNIWWCVLNWI PCGQSFFGPTLNSFIHILMSYYGLSVFSPMHKYLWVWKKYLTQAQLVQF  
Bwhale.XP_03672 FNIWWCVLNWI PCGQSFFGPTLNSFIHILMYTYGLSVFSPMHKYLWVWKKYLTQAQLVQF  
Rat.XP_03274049 FNIWWCVLNWI PCGQSFFGPTLNSFIHILMSYYGLSVFSPMHRYLWVWKKYLTQAQLVQF  
Mouse.NP_062296 FNIWWCVLNWI PCGQSFFGPTLNSFIHILMSYYGLSVFSPMHKYLWVWKKYLTQAQLVQF  
Gallus.NP_00118 FNIWWCVLNWI PCGQSFFGPTLNSFIHVLMSYYGLSVIPSMRKYLWVWKKYLTQAQLLQF  
Duck.XP_0273073 FNIWWCVLNWI PCGQSFFGPTLNSFIHVLMSYYGLSVIPSMRKYLWVWKKYLTQAQLLQF  
Frog.NP_0010161 FNIWWCVLNWI PCGQSFFGPTLNSFIHVLMSYYGLSVIPSMHKYLWVWKKYLTQAQLVQF  
Shark.XP_007900 FNIWWCVLNWI PCGQSFFGPTLNSFIHVLMSYYGLSTIPSMQPYLWVWKKYLTQAQLVQF  
ETE65396.1 FNIWWCVMNWI PCGQSFFGPTLNSFIHILMSYYGLSVIPSMRKYLWVWKKYLTQAQLLQF  
Salmo.NP_001130 FNIWWCVLNWI PCGQSFFGPTLNSFIHVCMSYYGLSTIPSMQKYLWVWKKYLTQAQLLQF  
Cherry FNIWWCVLNWI PCGQSFFGPTLNSFIHVCMSYYGLSTIPSMQKYLWVWKKYLTQAQLLQF  
Zebrafish.XP_00 FNIWWCVLNWI PCGQSFFGPTLNSFIHVLMSYYGLATIPSMHKYLWVWKKYLTQAQLVQF  
.*** *::**.***.***.*** *::**.***.***.*** *::**.***.***.*** *::**.***.***.***
```

```
HumanElovl5 VLTIIQTSCGVIWPCFPLGWLIFYQIGYMISLIALFTNFYIQTYNKKGASRRKDKHLDHQ  
Macaca.NP_00130 VLTIIQTSCGVIWPCFPLGWLIFYQIGYMISLIALFTNFYIQTYNKKGASRRKDKHLDHQ  
SeaLion.XP_0274 VLTIIQTSCGVLWPCFPLGWLIFYQIGYMISLITLFTNFYVYQTYNKKGASRRKEHLKDHQ  
Bat.XP_03626954 VLTIIQTTCGVIWPCSFPLGWLIFYQIGYMISLITLFTNFYIQTYNKQASRRKEHLKDHQ
```

# Spinocerebellar ataxia 38: structure-function analysis shows ELOVL5 G230V is proteotoxic, conformationally altered and a mutational hotspot

Ferrero et al.

```
FruitBat.XP_037 VLTIVQTSCGVVWPCSFPLGWLYLFQIGYMISLIIILFTNFYIQTYNKKGASRRKERLRDHQ
Mouse.NP_599016 VLTIIQTTCGVVWPCSFPLGWLYFFQIGYMISLIALFTNFYIQTYNKKGASRRKDHLKGHQ
Rat.NP_599209.1 VLTIIQTSCGVWPCSFPLGWLYLFQIGYMISLIALFTNFYIQTYNKKGASRRKEHLKGHQ
Beaver.JAV42152 VLTIIQTSCGVWPCSFPLGWLYLFQIGYMISLIALFTNFYIQTYNKKGASRRRDHLKDHQ
Pangolin.XP_017 VLTIIQTSCGVVWPCFPLGWLYLFQIGYMISLIVLFTNFYVQTYNKKGASRRREYLKDHQ
ChPangolin.XP_0 VLTIIQTSCGVVWPCAFPLGWLYLFQIGYMISLIVLFTNFYVQTYNKKGASRRREYLKDHQ
Mole.XP_0373757 VLTIIQTTCGVWPCFPLGWLYLFQIGYMISLITLFTNFYIQTYNKKGASRRKEHLKEHQ
Bos.NP_00104006 VLTIIQTSCGVWPCFPLGWLYLFQIGYMISLITLFTNFYIQTYNKKGVSRRREHQKDHQ
BlueWhale.XP_03 VLTIIQTSCGVWPCAFPLGWLYLFQIGYMISLIALFTNFYIQTYNKKGASRRREHQKDHQ
Dolphin.XP_0198 VLTIIQTSCGVWPCAFPLGWLYLFQIGYMISLIALFTNFYIQTYNKKGASRRRE----HQ
Gallus.NP_00118 VLTIFQTSCGVVWPCAFPLGWLYLFQIGYMISLIIILFTNFYIQTYNKKASRRKE----YQ
Duck.NP_0012973 VLTIFQTSCGVVWPCAFPLGWLYLFQIGYMISLIIILFTNFYIQTYNKKASRRKE----YQ
Falcon.XP_03724 VLTIFQTSCGVVWPCAFPLGWLYLFQIGYMISLIIILFTNFYIQTYNKKASRRKE----YQ
Turtle.XP_03775 VLTIFQTSCGVVWPCAFPLGWLYLFQIGYMISLIIILFTNFYIQTYNKKASRRKE----YQ
Komodo.KAF72468 VLTIFQTSCGVVWPCFPLGWLYLFQIGYMITLIIILFTNFYIQTYNKKACRRKE----YQ
Xenopus.NP_0010 VLTMTQTTCAMIWPCFPMGWLYLFQNCYMSLIIILFGNFYIKTYNKKTSRRKE----YQ
Salmo.NP_001130 FLTMSQTICAVIWPCGFPRGWLYFFQIFYMASLIAFFSNFYIQTYKKHRVSOKEY----HQ
Pike.AFR36912.1 FLTMTQTICAVIWPCGFPMGWLYLFQISYMTLIALFSNFYIQTYKKRSVSQKKEC----HR
Croaker.NP_0012 FLTMSQTLCAVVWPCGFPMGWLYLFQISYMTLIFLFSNFYVQTYKKHSVSLKKE----HQ
Rockfish.XP_037 FLTMTQTMCAVVWPCGFPMGWLYSFQISYMTLIFLFSNFYIQAYKKHSGSLKKE----HQ
AmSole.BBL33563 FLTVSHTMCAVIWPCGFPMGWLYFFQISYMTLIIILFSNFYIQTYQKHSRSLQKD----HR
Eel.XP_03525699 VMTMTQTSCAVVWPCGFPRGWLYLFQISYMTLIALFSNFYIQTYQKQGAFFRKE----HQ
Sturgeon.XP_033 VLTMTQTTCAVFRPCGFPMGWLYLFQICYLIVLIVLFSNFYIQTYKKRGSRRKE----CQ
Zebrafish.NP_95 VLTMTQTSCAVVWPCGFPMGWLYLFQISYMTLILLLFSNFYIQTYKKRSGSRKSD----YP
Eshark.XP_00789 VMTIIQTSGVVWPCGFPMGWLYLFQIGYMISLIVLFTNFYIQTYQKKSASRTKD----CL
WhaleShark.XP_0 VLTIIQTSGVIWPCGFPMGWLYLFQIGYMISLIIILFTNFYIQTYKKSAFKSKD----CL
Macaca.XP_02870 VLTIIHTMSAVVKPCGFPMGWLYLFQSSYMLTLVILFLNFYVQTYRKKPMKKDMQ----EP
Human.sp|Q9NXB9 VLTIIHTMSAVVKPCGFPMGWLYLFQSSYMLTLVILFLNFYVQTYRKKPMKKDMQ----EP
XP_036301996.1 VLTIIHTLSAVVKPCGFPMGWLYLFQSSYMLTLVILFLNFYVQTYRKKPMKKETE----EL
Bos.XP_02738008 LLTIIHTMSAVVRPCGFPMGWLYLFQSSYMLTLVILFLNFYVQTYRKKPMKKAME----E-
Bwhale.XP_03672 VLTIIHTMSAVVRPCGFPMGWLYLFQSSYMLTLVILFLNFYVQTYRKKPMKKDGE----EP
Rat.XP_03274049 VLTIIHTLSAVVKPCGFPMGWLYLFQSSYMLTLVILFLNFYVQTYRKKPKGKEMQ----EG
Mouse.NP_062296 VLTIIHTLSAVVKPCGFPMGWLYLFQSSYMLTLVILFLNFYVQTYRKKPVKKELO----E-
Gallus.NP_00118 LLTIVHTLSAAVKPCGFPMGWLYLFQSSYMATLVILFVNFYIKTYQKAPSRRTAAK----ET
Duck.XP_0273073 LLTIVHTLSAAVKPCGFPMGWLYLFQSSYMATLVILFVNFYIKTYRKAAPSRTAVK----ET
Frog.NP_0010161 LLTIIHTLSAAVKPCGFPMGWLYLFQSSYMATLVILFVNFYIKTYKRRPSKSDPN----GI
Shark.XP_007900 VLTIIHTVSAVVKPCGFPMGWLYLFQSSYMATLVILFVNFYVVKTYRKTVVQDNKT----N-
ETE65396.1 LLTIIHTLSAAVKPCGFPMGWLYLFQSSYMATLVVLFNFYVVKTYQKASAKANAK----EI
Salmo.NP_001130 ILTIIHTLSAIVVPCGFPMGWLYLFQSSYMATLVILFVNFYVQTYRKRPEES-----
Cherry ILTIIHTLSAIVVPCGFPMGWLYLFQSSYMATLVILFVNFYVQTYRKRPEES-----
Zebrafish.XP_00 VLTIIHTVSAVVVPCGFPLGWLYLFQTFYMCTLVVLFVNFYIQTYKRRKTEGGRM-----
.:*: :* . . * ** * * ** *: *: :* ***.:.*.*
```

```
HumanElov15 NGSMAAVNGHTNSFSPLENNVK-PRKLRKD
Macaca.NP_00130 NGSVAAVNGHTNSFSPLENNVK-PRKLRKD
SeaLion.XP_0274 NGSVAAVNGHTNSF-SLENNVK-PRKQRKD
Bat.XP_03626954 NGSMTAANGHTNSFSLENNVK-LRKQRKD
FruitBat.XP_037 NGSVTAANGHTNSFSLGNSTK-PRKQRKD
Mouse.NP_599016 NGSVAAVNGHTNSFPLENSVK-PRKQRKD
Rat.NP_599209.1 NGSMTAVNGHTNNFASLENSVT-SRKQRKD
Beaver.JAV42152 NGSATVVNGHTNTFSSLENNVK-PRKQRKD
Pangolin.XP_017 NGSMAAMNGHAGSFSSLGSSAK-PRKLRKD
ChPangolin.XP_0 NGSMAAVNGHAGSFSSLGNSVK-PRKLRKD
Mole.XP_0373757 NGSVAAVNGHTNSFSTLENNVK-LRKQRKD
Bos.NP_00104006 NGSVAAVNGHISSFSSLENNVK-PRKQRKD
BlueWhale.XP_03 NGSVTAVNGHTSSFSSLENNVK-PRKQRKD
Dolphin.XP_0198 NGSVTAVNGHTSSFSSLEHSVK-PRKQRKD
Gallus.NP_00118 NGSTATVNGYTNSFSSLENNVK-QRKQRKD
Duck.NP_0012973 NGSAAVNGYTNSFSSLENNVK-QRKQRKD
Falcon.XP_03724 NGSTATVNGYTNSSSSLENNVK-QRKQRKD
Turtle.XP_03775 NGSTAAVNGYTNSFSSLENNVK-QRKQRKD
Komodo.KAF72468 NGSTAAVNGYTNSFSSLENNVK-QRKQRKD
Xenopus.NP_0010 NGSASAVNGHTNSFSSLEDNVK-QRKQRKD
Salmo.NP_001130 NGSVDSLNGHANGVTPTE-TIT-HRKVRVD
Pike.AFR36912.1 NGSASPLNGHVSGVTPTE-TIT-HRKVRAD
```





**Spinocerebellar ataxia 38: structure-function analysis shows ELOVL5 G230V is proteotoxic, conformationally altered and a mutational hotspot**

*Ferrero et al.*

**Supplementary Table 8** ELOVL4 protein sequences for Multiple Sequence Alignment

|    | <b>Accession no.</b> | <b>Species</b>                                 | <b>Length<br/>(AA)</b> |
|----|----------------------|------------------------------------------------|------------------------|
| 1  | Q9GZR5.1             | <i>Homo sapiens</i> (Human)                    | 314                    |
| 2  | Q9EQC4.2             | <i>Mus musculus</i> (Mouse)                    | 312                    |
| 3  | XP_032765767.1       | <i>Rattus norvegicus</i> (Rat)                 | 314                    |
| 4  | AAI42460.1           | <i>Bos taurus</i> (Bovine)                     | 314                    |
| 5  | XP_046770079.1       | <i>Gallus gallus</i> (Chicken)                 | 314                    |
| 6  | XP_002936253.1       | <i>Xenopus tropicalis</i> (Frog)               | 328                    |
| 7  | ADJ95235.1           | <i>Salmo salar</i> (Salmon)                    | 306                    |
| 8  | XP_001366145.1       | <i>Monodelphis domestica</i> (Opossum)         | 314                    |
| 9  | XP_028902935.1       | <i>Ornithorhynchus anatinus</i> (Platypus)     | 321                    |
| 10 | XP_007104948.1       | <i>Physeter catodon</i> (Sperm whale)          | 314                    |
| 11 | XP_002714591.1       | <i>Oryctolagus cuniculus</i> (Rabbit)          | 314                    |
| 12 | XP_008683076.1       | <i>Ursus maritimus</i> (Polar bear)            | 314                    |
| 13 | XP_005299664.1       | <i>Chrysemys picta bellii</i> (Painted turtle) | 314                    |
| 14 | XP_011363206.1       | <i>Pteropus vampyrus</i> (Large flying fox)    | 313                    |
| 15 | XP_026520959.1       | <i>Notechis scutatus</i> (Tiger snake)         | 313                    |

**Spinocerebellar ataxia 38: structure-function analysis shows ELOVL5 G230V is proteotoxic, conformationally altered and a mutational hotspot**

*Ferrero et al.*

**Supplementary Table 9** MSA ELOVL5 (30 sequences) and ELOVL4 (15 Sequences)

CLUSTAL format alignment by MAFFT (v7.505) Method: L-INS-I, Blosom 62 matrix

```
HumanElovl5 -----MEHFDASLSTYFKALLGPRDRVKGWFLLDNYIPTFICS
Macaca.NP_00130 -----MEHFDASLSTYFKALLGPRDRVKGWFLLDNYIPTFICS
SeaLion.XP_0274 -----MENFDASLSTYFKALLGPRDRVKGWFLLDNYIPTFICS
Bat.XP_03626954 -----MEHFDASLSTYFKALLGPRDRVKGWFLLDNYIPTFICS
FruitBat.XP_037 -----MENFDASLSTYFKAWLGPRDRVKGWFLLDNYIPTFICS
Mouse.NP_599016 -----MEHFDASLSTYFKAFLLGPRDRVKGWFLLDNYIPTFVCS
Rat.NP_599209.1 -----MEHFDASLSTYFRALLGPRDRVKGWFLLDNYIPTFVCS
Beaver.JAV42152 -----MENFDASLSTYFRALLGPRDRVKGWFLLDNYIPTFVCS
Pangolin.XP_017 -----MENFDASLSTYFKALLGPRDRVKGWFLLDNYIPTFICS
ChPangolin.XP_0 -----MENFDASLSTYFKALLGPRDRVKGWFLLDNYIPTFICS
Mole.XP_0373757 -----MENFDASLSTYFKALLGPRDRVKGWFLLDNYIPTFICS
Bos.NP_00104006 -----MEHFDASLSTYFRALLGPRDRVGEVWFLLDNYVPTLVCS
BlueWhale.XP_03 -----MEHFDASLSTYFQALLGPRDLRVKGWFLLDNYIPTLLCS
Dolphin.XP_0198 -----MEHFDASLSTYFQALLGPRDRVKGWFLLDNYIPTLLCS
Gallus.NP_00118 -----MERLDKTINSYLDVWLGPRDRVKGWLLLENYPTPTFIFS
Duck.NP_0012973 -----MERLDKTINSYLDVWLGPRDRVKGWLLLENYPTPTFIFS
Falcon.XP_03724 -----MEFLDKTINSYLDVWLGPRDRVKGWLLLENYPTPTFIFS
Turtle.XP_03775 -----MESLDQTINSYLDVWFGPRDRVKGWLLLDNYIPTFIFS
Komodo.KAF72468 -----MESLDKTINSYLDVWLGPRDRVKGWLLLTNYPTPTFIFS
Xenopus.NP_0010 -----MEVLDAVNGYIDHLLGPKDRVRGWLLLDNYVPTILFT
Salmo.NP_001130 -----MEAFNHKLNTYIDSWMGPRDERVQGWLLLDNYPPPTFALT
Pike.AFR36912.1 -----METFNQRLNTYIDSWMGPRDERVRGWLLLDNYPPPTFALT
Croaker.NP_0012 -----METFNHKLNTYLESWVGPRDQVRGWLLLDNYPPPTFALT
Rockfish.XP_037 -----METFNHRLNTYLESWVGPRDQVRGWLLLDNYPPPTFALT
AmSole.BBL33563 -----METFNHKLNTYIDSWLGPRDQVRGWLLLDNYPPPTFALT
Eel.XP_03525699 MD-----MEMFNHRLNTYIDSWMGPRDQVRGWLLLDNYPPPTFALT
Sturgeon.XP_033 -----MEALNQATNAYIDSWMGPRDRVRGWFLLDNFSPVTVLT
Zebrafish.NP_95 -----METFSHRVNSYIDSWMGPRDLRVTWGFLLDNYIPTFIFT
Eshark.XP_00789 -----MGFADQTLNSYFDSWFGPRDRVVEGFLLLDNYPPPTFLT
WhaleShark.XP_0 -----MEAVDRTLNSYFVSWFGPRDRSRVEGFLLLDNYPPPTFILS
sp|Q9GZR5.1|ELO -----
XP_008683076.1 MGL-----LDSEPGSVLNVVSTALNDTVEFYRWTW-SITDKRVENWPLMQSPWPTLCIS
XP_002714591.1 MGL-----LDSEPGSVLNVVSTALNDTVEFYRWTW-SIADKRVEDWPLMRSPWPTLSIS
sp|Q9EQC4.2|ELO -----
XP_032765767.1 MGL-----LDSEPGSVLNAVSTAFNDTVEFYRWTW-SIADKRVEDWPLMQSPWPTLSIS
XP_011363206.1 MGL-----LDSEPGSVLNVVSTALNDTVEFYRWTW-SITDKRVENWPLMQSPLPTLCIS
AAI42460.1 MGL-----LDSEPGSVLNAVSTALNDTVEFYRWTW-SITDKRVENWPLMQSPLPTLCIS
XP_007104948.1 MGL-----LDSEPGSVLNVVSTALNDTVEFYRWTW-SITDKRVENWPMMQSPLPTLCIS
XP_001366145.1 MGL-----LDAEPARMLDAVSTAVNDTIEFYRWTW-TIVDKRVENWPLMQSPLPTLCIS
XP_028902935.1 MEAPGAARPAALDALGALDAVSSALNGSLRFYRWTW-TIADKRVENWPLMQSPLPTLTIS
XP_046770079.1 MGA-----AAAEPRAAGLVSSVLDNTLEFYRWTW-SIRDKRVDDWPLMQSPFPPTLTIS
XP_005299664.1 MGS-----AAEQGRATGLVSSLLNDTLEFYRWSW-SIRDKRVDDWFLMQSPFPPTLTIS
XP_026520959.1 MGH-----SGEP-----GLIANVVNDTLEFYRWSW-TIRDKRVDDWPMMQSFPPTLIIS
XP_002936253.1 -----MLSPVSDVIQRTLQLYDWCF-SIADKRVEKWPLMQSPLPTLAIS
ADJ95235.1 -----MEAVTHFMNDTVEFYRWSL-TIADKRVEKWPMMSAPPTLAIS
```

```
HumanElovl5 VIYLLIVVWLGPKYMKNRQPFSCRGILVVYINLGLTLLSLYMFCELVTVGWEGKYNFFCQGT
Macaca.NP_00130 VIYLLIVVWLGPKYMKNRQPFSCRGILVVYINLGLTLLSLYMFCELVTVGWEGKYNFFCQGT
SeaLion.XP_0274 VIYLLIVVWLGPKYMKNRQPFSCRGILVLYNLGLTLLSLYMFCELVKGVWEGRYNFFCQGT
Bat.XP_03626954 TIYLLIVVWLGPKYMKNRQPLACRKLIVVYINLGLTLLSLYMFCELVTVGWEGQYNFFCQGT
FruitBat.XP_037 VIYLLIVVWLGPKYMKNRQPFSCRGILVVYINLGLTLLSLYMFCELVTVGWEGKYNFFCQGT
Mouse.NP_599016 VIYLLIVVWLGPKYMKNRQPFSCRGILVLYNLGLTLLSLYMFYELVTVGWEGKYNFFCQGT
Rat.NP_599209.1 AIYLLIVVWLGPKYMKNRQPFSCRGILVVYINLGLTLLSLYMFYELVTVGWEGKYNFFCQGT
Beaver.JAV42152 VIYLLIVVWLGPKYMKNRQPFSCRGILVVYINLGLTLLSLYMFYELVTVGWEGKYNFFCQGT
Pangolin.XP_017 IYLLIVVWLGPKYMKNRQPFSCRGILVVYINLGLTLLSLYMFYELVTVGWEGRYNFFCQGT
ChPangolin.XP_0 IYLLIVVWLGPKYMKNRQPFSCRGILVVYINLGLTLLSLYMFYELVTVGWEGRYNFFCQGT
Mole.XP_0373757 VIYLLIVVWLGPKYMKNRQAFSCRGILVVYINLGLTLLSLYMFCELVTVGWEGKYNFFCQGT
Bos.NP_00104006 ILYLLIVVWLGPKYMKNRQPFSCRGILVVYINLGLTLLSLYMFCELVTVGWEGQYNFFCQGT
BlueWhale.XP_03 ILYLLIVVWLGPKYMKNRPPFSCRGILVVYINLGLTLLSLYMFCELVTVGWEGQYNFFCQGT
Dolphin.XP_0198 ILYLLIVVWLGPKYMKNRPPFSCRGILVLYNLGLTLLSLYMFCELVTVGWEGQYNFFCQGT
Gallus.NP_00118 VLYLLIVVWLGPKYMKNRQPFSCRGILVVYINLGLTLLSLYMFYELVTVGWEGGYNFFCQGT
Duck.NP_0012973 VLYLLIVVWLGPKYMKNRQPFSCRGILVVYINLGLTLLSLYMFYELVTVGWEGGYNFFCQGT
Falcon.XP_03724 VLYLLIVVWLGPKYMKNRQPFSCRGILVVYINLGLTLLSLYMFYELVTVGWEGGYNFFCQGT
Turtle.XP_03775 VLYLLIVVWLGPKYMKNRQPFSCRGILVVYINLGLTLLSLYMFYELVTVGWEGGYNFFCQGT
Komodo.KAF72468 VLYLLIVVWLGPKYMKNRPPFSCRGILVVYINLGLTLLSLYMFYELVTVGWEGGYNFFCQGT
Xenopus.NP_0010 ALYLLIVVWLGPKYMKNRPPVSCRGILVVYINLGLTLLSLYMFYELVTVGWEGGYNFFCQGT
Salmo.NP_001130 LMYLLIVVWLGPKYMRHRQPVSCQGLLVLYNLALTLTLLSYMFYEMVSAVWVGGYNYFCQGT
Pike.AFR36912.1 VIYLLIVVWAGPKFMRHRQPLSCRGFLVVYINLGLALLSLYMFSEMVAVWVGGYHFYFCQGT
```

**Spinocerebellar ataxia 38: structure-function analysis shows ELOVL5 G230V is proteotoxic, conformationally altered and a mutational hotspot**

Ferrero et al.

Croaker.NP\_0012 VMYLVIVVMGPKYMKHRQPYSCRGLLVLYNLGLTLLSFYMFYELVTAVWHGGYNFYCQDI  
Rockfish.XP\_037 IMYLLIVVMGPKYMKHRQPYSCRGLLVLYNLGLTLLSFYMFYELVSAVRHGGYNFYCQDT  
AmSole.BBL33563 VMYLLIVVWLGPKYMKHRQPYSCRGLLVVYNLGLTLLSFYMFYELVAVWHGDYNYFYCQNT  
Eel.XP\_03525699 VAYLLIVVMGPKYMKNRQPFSCRGLLVVYNLGLTLLSLYMFCELVNGMWQGNYNFFCQDT  
Sturgeon.XP\_033 LLYLFFVWVIGPKYMKNKEPFSCRGLLVVYNLGLTLLSFYMFYELVTGAWQGGYNFFCQDT  
Zebrafish.NP\_95 VMYLLIVVMGPKYMKNRQAYSCRALLVPYNLCLTLLSLYMFYELVMSVYQGGYNFFCQNT  
Eshark.XP\_00789 LIYLFFVWVAGPKYMKNKAPVSCRGLTVVYINIGLTLTLLSLYMFYELLTGVWEGGYSIFCQDT  
WhaleShark.XP\_0 LLYLFFVWVAGPKYMNKAPLSSRGILVVYINIGLTLTLLSLYMFCELVRVGVDGGYSIFCQNT  
sp|Q9GZR5.1|ELO -----EPFQMLVLI IYNFGMVLLNLFIFRELFMGSYNAGYSYICQSV  
XP\_008683076.1 TLYLLFVWLGPKWMDREPFQMLVLI IYNFGMVLLNLFIFRELFMGSYNAGYSYICQSV  
XP\_002714591.1 TLYLLFVWLGPKWMDREPFQMLVLI IYNFGMVLLNLFIFRELLMGSYNAGYSYICQSV  
sp|Q9EQC4.2|ELO -----EPFQMLVLI IYNFGMVLLNLFIFRELFMGSYNAGYSYICQSV  
XP\_032765767.1 TLYLLFVWLGPKWMDREPFQMLVLI IYNFGMVLLNLFIFRELFMGSYNAGYSYICQSV  
XP\_011363206.1 TLYLLFVWLGPKWMDREAFQMLVLI IYNFGMVLLNLFIFRELFMGSYNAGYSYICQSV  
AAI42460.1 TLYLLFVWLGPKWMDREPFQMLVLI IYNFGMVLLNLFIFRELLMGSYNAGYSYICQTV  
XP\_007104948.1 TLYLLFVWLGPKWMDREPFQMLVLI IYNFGMVLLNLFIFRELFMGSYNAGYSYICQSV  
XP\_001366145.1 TLYLLFVWLGPKWMDREPFQMLVLI IYNFGMVLLNLFIFRELFLASTAAGYSYICQSV  
XP\_028902935.1 TLYLLFVWLGPKWMDREPFQMLVLI IYNFGMVLLNLFIFKELFLGSAAGYSYICQSV  
XP\_046770079.1 TIYLLTVWLGPKWMDREPFQMLVLI IYNFGMVLLNLFIFKELFLSRRARGYSYICQTV  
XP\_005299664.1 TLYLLTVWLGPKWMDREPFQMLVLI IYNFGMVLLNLFIFKELFLASRRARGYSYICQTV  
XP\_026520959.1 TLYLLAVWLGPKWMDREPFQMLVLI IYNFGMVLLNLFIFKELLLSRRARGYSYICQSV  
XP\_002936253.1 TAYLLVWVWLGPKFMKNREPFQMLVLI IYNFGMVLI IYNFGMVLI IYNFGMVLI IYNFGMVLI  
ADJ95235.1 CLYLLFLWAGPKYMQNREPFQMLVLI IYNFMSVMI IYNFMSVMI IYNFMSVMI IYNFMSVMI  
 . : \* \*\* . : : \* : : : \* : . \* \*\*

HumanElovl5 -RTAGESDMKI IIRVLWYYYFSKLIIEFMDTFFFILRKNNHQITVLHVYHHASMLNIWWFVM  
Macaca.NP\_00130 -RTAGESDMKI IIRVLWYYYFSKLIIEFMDTFFFILRKNNHQITVLHVYHHASMLNIWWFVM  
SeaLion.XP\_0274 -RSAGEADMKI IIRVLWYYYFSKLIIEFMDTFFFILRKNNHQITVLHVYHHASMLNIWWFVM  
Bat.XP\_03626954 -RSAGEADMKI IIRVLWYYYFSKLIIEFMDTFFFILRKNNHQITVLHVYHHASMLNIWWFVM  
FruitBat.XP\_037 -RSAGEADMKI IIRVLWYYYFSKLIIEFMDTFFFILRKNNHQITVLHVYHHASMLNIWWFVM  
Mouse.NP\_599016 -RSAGESDMKI IIRVLWYYYFSKLIIEFMDTFFFILRKNNHQITVLHVYHHATMLNIWWFVM  
Rat.NP\_599209.1 -RSAGESDMKI IIRVLWYYYFSKLIIEFMDTFFFILRKNNHQITVLHVYHHATMLNIWWFVM  
Beaver.JAV42152 -RSAGESDMKI IQVLWYYYFSKLIIEFMDTFFFILRKNNHQITVLHVYHHASMLNIWWFVM  
Pangolin.XP\_017 -RSSGEADVIVIRVLWYYYFSKLIIEFMDTFFFILRKNNHQITVLHVYHHVSMMLNIWWFVM  
ChPangolin.XP\_0 -RSSGEADVIVIRVLWYYYFSKLIIEFMDTFFFILRKNNHQITVLHVYHHVSMMLNIWWFVM  
Mole.XP\_0373757 -RSAGEADMKI IIRVLWYYYFSKLIIEFMDTFFFILRKNNHQITVLHVYHHASMLNIWWFVM  
Bos.NP\_00104006 -RSAGEADMKI IIRVLWYYYFSKLIIEFMDTFFFILRKNNHQITVLHVYHHASMLNIWWFVM  
BlueWhale.XP\_03 -RSAGEADMKI IIRVLWYYYFSKLIIEFMDTFFFILRKNNHQITVLHVYHHASMLNIWWFVM  
Dolphin.XP\_0198 -RSAGEADMKI IIRVLWYYYFSKLIIEFMDTFFFILRKNNHQITVLHVYHHASMLNIWWFVM  
Gallus.NP\_00118 -HSGGEADMKI IIRVLWYYYFSKLIIEFMDTFFFILRKNNHQITVLHVYHHATMLNIWWFVM  
Duck.NP\_0012973 -HSGGEADMKI IIRVLWYYYFSKLIIEFMDTFFFILRKNNHQITVLHVYHHATMLNIWWFVM  
Falcon.XP\_03724 -HSGGEADMKI IIRVLWYYYFSKLIIEFMDTFFFILRKNNHQITVLHVYHHATMLNIWWFVM  
Turtle.XP\_03775 -HSGGEADMKI IIRVLWYYYFSKLIIEFMDTFFFILRKNNHQITVLHVYHHASMLNIWWFVM  
Komodo.KAF72468 -HSGGEADMKI IIRVLWYYYFSKLIIEFMDTFFFILRKNNHQITVLHVYHHATMLNIWWFVM  
Xenopus.NP\_0010 -NSGGDADTKI IIRVLWYYYFSKLIIEFMDTFFFILRKNNHQITVLHVYHHASMLNIWWFVM  
Salmo.NP\_001130 -HSAGETDTKI IIRVLWYYYFSKLIIEFMDTFFFILRKNNHQITVLHVYHHASMLNIWWFVM  
Pike.AFR36912.1 -RSAGEADTKI IIRVLWYYYFSKLIIEFMDTFFFILRKNNHQITVLHVYHHASMLNIWWFVM  
Croaker.NP\_0012 -HSAQEVNKKI IIRVLWYYYFSKLIIEFMDTFFFILRKNNHQITVLHVYHHASMLNIWWFVM  
Rockfish.XP\_037 -HSAQEVNKKI IIRVLWYYYFSKLIIEFMDTFFFILRKNNHQITVLHVYHHASMLNIWWFVM  
AmSole.BBL33563 -HSAQEVNKKI IIRVLWYYYFSKLIIEFMDTFFFILRKNNHQITVLHVYHHASMLNIWWFVM  
Eel.XP\_03525699 -HSAQEVNKKI IIRVLWYYYFSKLIIEFMDTFFFILRKNNHQITVLHVYHHASMLNIWWFVM  
Sturgeon.XP\_033 -HSGGDADTKI IIRVLWYYYFSKLIIEFMDTFFFILRKNNHQITVLHVYHHATMLNIWWFVM  
Zebrafish.NP\_95 -HSGGDADTKI IIRVLWYYYFSKLIIEFMDTFFFILRKNNHQITVLHVYHHATMLNIWWFVM  
Eshark.XP\_00789 -HSAGKADLKI IIRVLWYYYFSKLIIEFMDTFFFILRKNNHQITVLHVYHHATMLNIWWFVM  
WhaleShark.XP\_0 -HNAGEADLKI IIRVLWYYYFSKLIIEFMDTFFFILRKNNHQITVLHVYHHATMLNIWWFVM  
sp|Q9GZR5.1|ELO DYSNDVNEVRIAAALWYFVSKGVEYLDTVFFILRKNNHQITVLHVYHHCTMFTLWVIGI  
XP\_008683076.1 DYSNDVNEVRIAAALWYFVSKGVEYLDTVFFILRKNNHQITVLHVYHHCTMFTLWVIGI  
XP\_002714591.1 DYSNDVNEVRIAAALWYFVSKGVEYLDTVFFILRKNNHQITVLHVYHHCTMFTLWVIGI  
sp|Q9EQC4.2|ELO DYSNDVNEVRIAGALWYFVSKGVEYLDTVFFILRKNNHQITVLHVYHHCTMFTLWVIGI  
XP\_032765767.1 DYSNDVNEVRIAAALWYFVSKGVEYLDTVFFILRKNNHQITVLHVYHHCTMFTLWVIGI  
XP\_011363206.1 DYSNDVNEVRIAAALWYFVSKGVEYLDTVFFILRKNNHQITVLHVYHHCTMFTLWVIGI  
AAI42460.1 DYSNDVNEVRIAAALWYFVSKGVEYLDTVFFILRKNNHQITVLHVYHHCTMFTLWVIGI  
XP\_007104948.1 DYSNDVNEVRIAAALWYFVSKGVEYLDTVFFILRKNNHQITVLHVYHHCTMFTLWVIGI  
XP\_001366145.1 NYSDDVNEVRIAGALWYFVSKGVEYLDTVFFILRKNNHQITVLHVYHHCTMFTLWVIGI  
XP\_028902935.1 DYSNDVNEVRIAAALWYFVSKGVEYLDTVFFILRKNNHQITVLHVYHHCTMFTLWVIGI  
XP\_046770079.1 DYSNDVNEVRIAAALWYFVSKGVEYLDTVFFILRKNNHQITVLHVYHHCTMFTLWVIGI  
XP\_005299664.1 DYSNDVNEVRIAGALWYFVSKGVEYLDTVFFILRKNNHQITVLHVYHHCTMFTLWVIGI  
XP\_026520959.1 DYSNDVNEVRIAGALWYFVSKGVEYLDTVFFILRKNNHQITVLHVYHHCTMFTLWVIGI  
XP\_002936253.1 DYSDDENEVRIASALWYFVSKGVEYLDTVFFILRKNNHQITVLHVYHHCTMFTLWVIGI  
ADJ95235.1 SYSNDVNEVRIASALWYFVSKGVEYLDTVFFILRKNNHQITVLHVYHHCTMFTLWVIGI  
 . : : \* \*\* . : : \* : : : \* : . \* \*\*

HumanElovl5 NWWPCGHSYFGATLNSFIHVMYSYGLSSV-PSMRPYLWKKYITQGQLLQVLTIIQT

# Spinocerebellar ataxia 38: structure-function analysis shows ELOVL5 G230V is proteotoxic, conformationally altered and a mutational hotspot

Ferrero et al.

Macaca.NP\_00130 NWVPCGHSYFGATLNSFIHVLMSYSGYGLSSV-PSMRPYLWKKYITQGQLLQFVLTIIQT  
SeaLion.XP\_0274 NWVPCGHSYFGATLNSFIHVLMSYSGYGLSSV-PSVPRPYLWKKYITQGQLLQFVLTIIQT  
Bat.XP\_03626954 NWVPCGHSYFGATLNSFIHVLMSYSGYGLSSV-PSMRPYLWKKYITQGQLI QFVLTIIQT  
FruitBat.XP\_037 NWVPCGHSYFGATLNSFIHVLMSYSGYGLSSV-PSMRPYLWKKYITQGQLLQFVLTIVQT  
Mouse.NP\_599016 NWVPCGHSYFGATLNSFIHVLMSYSGYGLSSI-PSMRPYLWKKYITQGQLVQFVLTIIQT  
Rat.NP\_599209.1 NWVPCGHSYFGATLNSFIHVLMSYSGYGLSSV-PSMRPYLWKKYITQGQLVQFVLTIIQT  
Beaver.JAV42152 NWVPCGHSYFGATLNSFIHVLMSYSGYGLSSV-PSMRPYLWKKYITQGQLI QFVLTIIQT  
Pangolin.XP\_017 NWVPCGHSYFGATLNSFIHVLMSYSGYGLSSV-PSMRPYLWKKYITQGQLLQFVLTIIQT  
ChPangolin.XP\_0 NWVPCGHSYFGATLNSFIHVLMSYSGYGLSSV-PSMRPYLWKKYITQGQLLQFVLTIIQT  
Mole.XP\_0373757 NWVPCGHSYFGATLNSFIHVLMSYSGYGLSSV-PSMRPYLWKKYITQGQLLQFVLTIIQT  
Bos.NP\_00104006 NWVPCGHSYFGATLNSFIHVLMSYSGYGLSSI-PSMRPYLWKKYITQGQLLQFVLTIIQT  
BlueWhale.XP\_03 NWVPCGHSYFGATLNSFIHVLMSYSGYGLSSV-PSMRPYLWKKYITQGQLLQFVLTIIQT  
Dolphin.XP\_0198 NWVPCGHSYFGATLNSFIHVLMSYSGYGLSSV-PSMRPYLWKKYITQGQLVQFVLTIIQT  
Gallus.NP\_00118 NWVPCGHSYFGATLNSFIHVLMSYSGYGLSAV-PAMRPYLWKKYITQGQLI QFVLTIFQT  
Duck.NP\_0012973 NWVPCGHSYFGATLNSFIHVLMSYSGYGLSAV-PAMRPYLWKKYITQGQLTQFVLTIFQT  
Falcon.XP\_03724 NWVPCGHSYFGATLNSFIHVLMSYSGYGLSAV-PAMRPYLWKKYITQGQLI QFVLTIFQT  
Turtle.XP\_03775 NWVPCGHSYFGATLNSFIHVLMSYSGYGLSAI-PAMRPYLWKKYITQGQLI QFVLTIFQT  
Komodo.KAF72468 NWVPCGHSYFGATLNSFIHVLMSYSGYGLSAI-PSMRPYLWKKYITQGQLI QFVLTIFQT  
Xenopus.NP\_0010 NWVPCGHSYFGATLNSFIHVLMSYSGYGLSAI-PAMRPYLWKKYITQCLTQFVLTMTQT  
Salmo.NP\_001130 NWVPCGHSYFGATLNSFVHVLMSYSGYGLSAV-PAIRPYLWKKYITQGQLI QFVLTMSQT  
Pike.AFR36912.1 NWVPCGHCYFGACLNSFIHVLMSYSGYGLSAI-PTMRPYLWKKYITQGQLI QFVLTMTQT  
Croaker.NP\_0012 NWVPCGHSYFGASLNSFVHVMYSYGLSAI-PAMRPYLWKKYITQLQTLQFVLTMSQT  
Rockfish.XP\_037 NWVPCGHSYFGASLNSFVHVMYSYGLSAI-PAIRPYLWKKYITQFQLI QFVLTMSQT  
AmSole.BBL33563 NWVPCGHSYFGASLNSFVHVMYSYGLSAI-PAMRPYLWKKYITQLQTLQFVLTMSQT  
Eel.XP\_03525699 NWVPCGHSYFGASLNSFIHVLMSYSGYGLSAV-PALRPYLWKKYITQGQLI QFVMTMIQT  
Sturgeon.XP\_033 NWVPCGHSYFGASLNSFIHVLMSYSGYGLSAI-PAVRPYLWKKYITQGQLI QFVLTMSQT  
Zebrafish.NP\_95 NWVPCGHSYFGATFNSFIHVLMSYSGYGLSAV-PALRPYLWKKYITQGQLVQFVLTMSQT  
Eshark.XP\_00789 NWVPCGHSYFGATLNSFIHVLMSYSGYGLSAI-PAMRPYLWKKYITQGQLI QFVMTIIQT  
WhaleShark.XP\_0 NWVPCGHSYFGATLNSFIHVLMSYSGYGLSAI-PAMRPYLWKKYITQGQLI QFVLTIIQT  
sp|Q9GZR5.1|ELO KVVAGGQAFFGAQLNSFIHVMYSYGLTAFGPWIQKYLWKKRYLTMLQLI QFHVLTIGHT  
XP\_008683076.1 KVVAGGQAFFGAQLNSFIHVMYSYGLTAFGPWIQKYLWKKRYLTMLQLI QFHVLTIGHT  
XP\_002714591.1 KVVAGGQAFFGAQMNNSFIHVMYSYGLTAFGPWIQKYLWKKRYLTMLQLVQFHVLTIGHT  
sp|Q9EQC4.2|ELO KVVAGGQAFFGAQMNNSFIHVMYSYGLTAFGPWIQKYLWKKRYLTMLQLVQFHVLTIGHT  
XP\_032765767.1 KVVAGGQAFFGAQMNNSFIHVMYSYGLTAFGPWIQKYLWKKRYLTMLQLVQFHVLTIGHT  
XP\_011363206.1 KVVAGGQAFFGAQLNSFIHVMYSYGLTAFGPWIQKYLWKKRYLTMLQLVQFVVTIGHT  
AAI42460.1 KVVAGGQAFFGAQMNNSFIHVMYSYGLTAFGPWIQKYLWKKRYLTMLQLVQFHVLTIGHT  
XP\_007104948.1 KVVAGGQAFFGAQMNNSFIHVMYSYGLTAFGPWIQKYLWKKRYLTMLQLVQFHVLTIGHT  
XP\_001366145.1 KVVAGGQAFFGAQLNSFIHVMYSYGLTAFGPWIQKYLWKKRYLTMLQLVQFVVTIGHT  
XP\_028902935.1 KVVAGGQAFFGAQLNSFIHVMYSYGLAALGPKQKYLWKKRYLTMLQLVQFHVLTIGHT  
XP\_046770079.1 KVVAGGQAFFGAQMNNSFIHVMYSYGLAALGPKQKYLWKKRYLTMLQLVQFHVLTIGHT  
XP\_005299664.1 KVVAGGQAFFGAQMNNSFIHVMYSYGLAALGPKQKYLWKKRYLTMLQLVQFHVLTIGHT  
XP\_026520959.1 KVVAGGQAFFGAHINALIHVMYSYGLAALGPKQKYLWKKRYLTMLQLVQFHVLTIGHT  
XP\_002936253.1 KVVAGGQAFFGAHINALIHVMYSYGLAALGPKQKYLWKKRYLTMLQLVQFHVLTIGHT  
ADJ95235.1 KVVAGGQAFFGAGINSSIHVMYSYGLAALGPKQKYLWKKRYLTMLQLVQFHVLTIGHT  
\*:. \*:.\*\*\* :\*: :\*:\*\* \*\*.\*: \* : :\*\*\*\*:\* \* : \* \* :\* : :

HumanElovl5 SCGVIWPCFPLGWL YFQIGYMSLIALFTNFYIQTYNKKGAS-----RRKDHLKDHQ  
Macaca.NP\_00130 SCGVIWPCFPLGWL YFQIGYMSLIALFTNFYIQTYNKKGAS-----RRKDHLKDHQ  
SeaLion.XP\_0274 SCGVIWPCFPLGWL YFQIGYMSLITLFTNFYVQTYNKKGAS-----RRKEHLKDHQ  
Bat.XP\_03626954 TCGVIWPCSFPLGWL YFQIGYMSLITLFTNFYIQTYNKQGAS-----RRKEHLKDHQ  
FruitBat.XP\_037 SCGVIWPCSFPLGWL YFQIGYMSLITLFTNFYIQTYNKKGAS-----RRKERLRDHQ  
Mouse.NP\_599016 TCGVWPCSFPLGWL YFQIGYMSLIALFTNFYIQTYNKKGAS-----RRKDHLKGHQ  
Rat.NP\_599209.1 SCGVIWPCSFPLGWL YFQIGYMSLIALFTNFYIQTYNKKGAS-----RRKEHLKGHQ  
Beaver.JAV42152 SCGVIWPCSFPLGWL YFQIGYMSLIALFTNFYIQTYNKKGAS-----RRRDHLKDHQ  
Pangolin.XP\_017 SCGVIWPCFPLGWL YFQIGYMSLIVLFTNFYVQTYNKKGAS-----RRREYLKDHQ  
ChPangolin.XP\_0 SCGVIWPCAFPLGWL YFQIGYMSLIVLFTNFYVQTYNKKGAS-----RRREYLKDHQ  
Mole.XP\_0373757 TCGVIWPCFPLGWL YFQIGYMSLITLFTNFYIQTYNKKGAS-----RRKEHLKDHQ  
Bos.NP\_00104006 SCGVIWPCFPLGWL YFQIGYMSLITLFTNFYIQTYNKKGVS-----RRREHQKDHQ  
BlueWhale.XP\_03 SCGVIWPCAFPLGWL YFQIGYMSLIALFTNFYIQTYNKKGAS-----RRREHQKDHQ  
Dolphin.XP\_0198 SCGVIWPCAFPLGWL YFQIGYMSLIALFTNFYIQTYNKKGAS-----RRRE----HQ  
Gallus.NP\_00118 SCGVIWPCAFPLGWL YFQIFYMSLITLFTNFYIQTYNKKASS-----RRKE----YQ  
Duck.NP\_0012973 SCGVIWPCAFPLGWL YFQISYMSLITLFTNFYIQTYNKKASS-----RRKE----YQ  
Falcon.XP\_03724 SCGVIWPCAFPLGWL YFQISYMSLITLFTNFYIQTYNKKASS-----RRKE----YQ  
Turtle.XP\_03775 SCGVIWPCAFPLGWL YFQIFYMSLITLFTNFYIQTYNKKASS-----RRKE----YQ  
Komodo.KAF72468 SCGVIWPCFPLGWL YFQIGYMITLITLFTNFYIQTYNKKAAC-----RRKE----YQ  
Xenopus.NP\_0010 TCAMIWPCFPLGWL YFQNCYMSLITLFTNFYIQTYNKKTSS-----RRKE----YQ  
Salmo.NP\_001130 ICAMIWPCFPLGWL YFQIFYMASLIAFFSNFYIQTYNKHSVS-----QKEY----HQ  
Pike.AFR36912.1 ICAMIWPCFPLGWL YFQISYMTLIALFSNFYIQTYNKHSVS-----QKKEC---HR  
Croaker.NP\_0012 LCAMIWPCFPLGWL YFQISYMTLIFLFSNFYVQTYKHSVS-----LKKE----HQ  
Rockfish.XP\_037 MCAMIWPCFPLGWL YFQISYMTLIFLFSNFYIQTYNKHSVS-----LKKE----HQ  
AmSole.BBL33563 MCAMIWPCFPLGWL YFQISYMTLIFLFSNFYIQTYNKHSVS-----LQKD----HR  
Eel.XP\_03525699 MCAMIWPCFPLGWL YFQISYMTLIALFSNFYIQTYNKHSVS-----RRKE----HQ  
Sturgeon.XP\_033 TCAVFRPCFPLGWL YFQICYLIVLIVLFSNFYIQTYNKHSVS-----RRKE----CQ

# Spinocerebellar ataxia 38: structure-function analysis shows ELOVL5 G230V is proteotoxic, conformationally altered and a mutational hotspot

Ferrero et al.

```
Zebrafish.NP_95      SCAVVWPCGPFPMGWLYFQISYMTLILLFSNFYIQTYKKRSGS-----RKSD----YP
Eshark.XP_00789    SFGVWVPCGFPSSGWLYFQIGYMISLIVLFTNFYIQTYQKKSAS-----RTKD----CL
WhaleShark.XP_0    SFGVIWPCGFPSSGWLYFQIGYMISLIIILFTNFYIQTYKKKSASF-----KSKD----CL
Human ELOVL4      ALSLYTDCPFPKMMHWALIAYAISFIFLFLNFYIRTYKEPKKP-----KAGKT----AM
XP_008683076.1    ALSLYTDCPFPKMMHWALIAYAISFIFLFLNFYVRYTYKEPKKA-----KTGKT----AV
XP_002714591.1    ALSLYTDCPFPKMMHWALIAYAISFIFLFLNFYIRTYNEPKKP-----KTGKT----AM
sp|Q9EQC4.2|ELO   ALSLYTDCPFPKMMHWALIAYAISFIFLFLNFYTRTYNEPKQS-----KTGKT----AT
XP_032765767.1    ALSLYTDCPFPKMMHWALIAYAISFIFLFLNFYTRTYNEPKKS-----KTGKT----AT
XP_011363206.1    ALSLYTDCPFPKMMHWALIAYAISFIFLFLNFYVRYTYNEPKKS-----KTGKT----AV
AAI42460.1        ALSLYTDCPFPKMMHWALIVYAVSFISFIFLFLNFYVRYTYKEPKKA-----KPGKT----AT
XP_007104948.1    ALSLYTDCPFPKMMHWALIAYAVSFISFIFLFLNFYVRYTYKEPKKA-----KPGKT----AA
XP_001366145.1    ALSLYTDCPFPKMMHWALIVYAVSFISFIFLFLNFYQTYNDPKTS-----KNRTA----AA
XP_028902935.1    AMSLYTNCPPFRMMHWALIVYAVSFISFIFLFLNFYQTYNQPKRSA-----KTGKT----AV
XP_046770079.1    ALSIYIDCPFPMMHWGVIFYAITFISFLFGNFYRTYKLPKEP-----VKNGK----IA
XP_005299664.1    AMSIYIDCPFPMMHWGVIFYAITFISFLFGNFYRTYKMPKEP-----IKNGK----IL
XP_026520959.1    ALSIYIDCPFPMMHWGVIFYAASFIVLFGNFYRTYKMPKQPKELKQEKNGK----IT
XP_002936253.1    ALSLYIDCPFPMMHWALIVYAVSFISFLFGNFYRTYKMPKQPKELKQEKNGK----LI
ADJ95235.1        GHSLYTGCFPPAWMQWALIGYAVTFISILFGNFYQTYRRTRPSA-----HKVAKP----VT
      .:  *  *  *      *      .: * : * * * * : : *
```

```
HumanElov15      NGSMAAVNG-----HTNS-FSPLENN-----VKPRKLRKD--
Macaca.NP_00130   NGSVAAVNG-----HTNS-FSPLENN-----VKPRKLRKD--
SeaLion.XP_0274   NGSVAAVNG-----HTNS-F-SLENN-----VKPRKQRKD--
Bat.XP_03626954  NGSLTAANG-----HTNS-FSSLENN-----VKLRKQRKD--
FruitBat.XP_037  NGSVTAANG-----HTNS-FSSLGNS-----TKPRKQRKD--
Mouse.NP_599016  NGSVAAVNG-----HTNS-FPSLENS-----VKPRKQRKD--
Rat.NP_599209.1  NGSMTAVNG-----HTNN-FASLENS-----VTSRKQRKD--
Beaver.JAV42152  NGSATVVNG-----HTNT-FSSLENN-----VKPRKQRKD--
Pangolin.XP_017  NGSMAAMNG-----HAGS-FSSLGSS-----AKPRKLRKD--
ChPangolin.XP_0  NGSMAAVNG-----HAGS-FSSLGNS-----VKPRKLRKD--
Mole.XP_0373757  NGSVAAVNG-----HTNS-FSTLENN-----VKLRKQRKD--
Bos.NP_00104006  NGSVAAVNG-----HISS-FSSLENN-----VKPRKQRKD--
BlueWhale.XP_03  NGSVTAVNG-----HTSS-FSSLENN-----VKPRKQRKD--
Dolphin.XP_0198  NGSVTAVNG-----HTSS-FSSLEHS-----VKPRKQRKD--
Gallus.NP_00118  NGSTATVNG-----YTNS-FSSLENN-----VKQRKQRKD--
Duck.NP_0012973  NGSAATVNG-----YTNS-FSSLENN-----VKQRKQRKD--
Falcon.XP_03724  NGSTATVNG-----YTNS-SSSLENN-----VKQRKQRKD--
Turtle.XP_03775  NGSTAAVNG-----YTNS-FSSLENN-----VKQRKQRKD--
Komodo.KAF72468  NGSTAAVNG-----YTNS-FSSLENN-----VKQRKQRKD--
Xenopus.NP_0010  NGSASAVNG-----HTNS-FSSLEDN-----VKQRKQRQD--
Salmo.NP_001130  NGSVDSLNG-----HANG-VTPTE-T-----ITHRKVRVD--
Pike.AFR36912.1  NGSASPLNG-----HVSG-VTPIE-T-----ITHKVRAD--
Croaker.NP_0012  NGSPVSTNG-----HANG-TPSLE-H-----AAHKKLRVD--
Rockfish.XP_037  NGSPISTNG-----HANG-TPSME-R-----TAYQKLRMD--
AmSole.BBL33563  NGSPASRNG-----HANG-KPSAE-Q-----PAHKKLRVD--
Eel.XP_03525699  NGSAAAMNG-----HSNG-VSPA-E-D-----LTRRKLKRV--
Sturgeon.XP_033  NGSAAASLNG-----HANG-VSSVD-N-----VTQRKLRKD--
Zebrafish.NP_95  NGS---VNG-----HTNG-VMSSE-K-----IKHRKARAD--
Eshark.XP_00789  NGS---ANG-----HTNG-FSAQTDH-----YSAKKTTH---
WhaleShark.XP_0  NGSTIAANG-----HTNG-LSTQMDH-----YSEKKTTH---
sp|Q9GZR5.1|ELO  NGI--SANG-----VSKSEKQLMIENG--KKQKNGKAKGD
XP_008683076.1   NGI--SANG-----VSKSEKQLVIENG--KKQKNGKAKGE
XP_002714591.1   NGI--SANG-----VSKSDNQLVIENG--KKQKNGKAKGE
sp|Q9EQC4.2|ELO  NGI--SSNG-----VSKSEKAL--ENG--KPQKNGKPKGE
XP_032765767.1  NGI--SANG-----VSKSEKQLVLENG--KPQKNGKPKGE
XP_011363206.1  NGI--SANG-----VSKSEK-LVMENG--KKQKNGKAKGE
AAI42460.1       NGI--SANG-----VSKSENHLVVENG--KKQKNGKAKGE
XP_007104948.1  NGI--SANG-----VNQSENHLVVENG--KKQKNGKAKRE
XP_001366145.1  NGI--SANG-----ISKSEKQLVMENG--KKKHNGKAKGE
XP_028902935.1  NGI--TTNG-----VSKSESQSVVENG--KKKNGKAKGE
XP_046770079.1  NGA--VANG-----VSKPENNPVVENG--KKQKNGKAKGE
XP_005299664.1  NGA--VANG-----VSKLENNLVVENG--KKQKKEKAKGE
XP_026520959.1  NGV--IANG-----KSKPENGAVMENG--KVQKK--AKGE
XP_002936253.1  NGK-TSVNGKSSVNGKCQINGKLMNGAVNGAVSKQDNKVGQENG--RKRKGRKAKRE
ADJ95235.1       NGVSMATNG-----YNKLQD--VEENGLKQKKGRKAKRE
      **      **      :
```

# Spinocerebellar ataxia 38: structure-function analysis shows ELOVL5 G230V is proteotoxic, conformationally altered and a mutational hotspot

Ferrero et al.

Supplementary Table 10 MSA of ELOVL5 (7 sequences) + ELOVL2 (7 sequences) + ELOVL4 (7 sequences)

CLUSTAL format alignment by MAFFT (v7.505); L-INS-I method; Blosum 62 matrix.

```
human_ELOVL5 -----MEHFDASLSTYFKALLGPRDTRVKGWFLLDNYIPTFVCSVIYLLIV
mus_ELOVL5 -----MEHFDASLSTYFKAFGLGPRDTRVKGWFLLDNYIPTFVCSVIYLLIV
rat_ELOVL5 -----MEHFDASLSTYFRALLGPRDTRVKGWFLLDNYIPTFVCSAIYLLIV
bos_ELOVL5 -----MEHFDASLSTYFRAWLGPRDTRVEGWFLLDNYVPTLVCSILYLLIV
gallus_ELOVL5 -----MERLDKTINSYLDVWLGPRDPRVKGWLLLENYPTTFIFSVLYLLIV
frog_ELOVL5 -----MEVLDKAVNGYIDHLLGPKDPRVKGWLLLDNYVPTIFFTALYLFIV
salmo_ELOVL5 -----MEAFNHKLNTYIDSWMGPRDERVQGWLLLDNYPPFTALTMYYLLIV
human_ELOVL2 -----MEHLKAFDDEINAFLDNMFGRDSDRVRGWFMLDSYLPFTFLLTVMYLLSI
bos_ELOVL2 -----MEHLKAFDDEVNAFLDNMFGPRDSDRVRGWFMLDSYLPFTFLLTIVYLLSI
mus_ELOVL2 -----MEQLKAFDNEVNAFLDNMFGPRDSDRVRGWFLLDSYLPFTILTITYLLSI
rat_ELOVL2 -----MEQLKAFDNEVNAFLDNMFGPRDSDRVRGWFLLDSYLPFTLTIVYLLSI
gallus_ELOVL2 -----MEHLKAFDQEVNAFVDYMFGRDARVRGWLLDSYLPFTFLLTVAYLLCI
frog_ELOVL2 -----MEHIEKLDQEVNAFVDYLFGRDTRVRGWMLDSYLPFTFLLTLLYLLSI
salmo_ELOVL2 -----MNHQLSLDERLNKLFYFLFEDRSDRVRGWLLDSYLPFTLSLTILYLLSV
human_ELOVL4 MGLLDSEPGSVLNVSTALNDTVEFYRWTWSIADKRVENWPLMQSPWPPTSISTLYLLFV
mus_ELOVL4 MGLLDSEPGSVLNAVSTAFNDTVEFYRWTWSIADKRVEDWPLMQSPWPPTSISTLYLLFV
rat_ELOVL4 MGLLDSEPGSVLNAVSTAFNDTVEFYRWTWSIADKRVEDWPLMQSPWPPTSISTLYLLFV
bos_ELOVL4 MGLLDSEPGSVLNAVSTALNDTVEFYRWTLSITDKRVENWPLMQSPLPTLCISTLYLLFV
gallus_ELOVL4 MGA AAAEPPRAAGLVSVLNDTLEFYRWTWSIRDKRVDWPLMQSPPTLTISTIYLLTV
frog_ELOVL4 -----MLNPVSDVIQRTLRLYDWCLSIDDKRVEKWPLMQSPLPTLAISTVYLLV
salmo_ELOVL4 -----MELTTHLINDTMNLYKWALTADKRVEKWPLMDNPLPTLAISSSYLLFL
* * * * : : : : * * * * :
```

```
human_ELOVL5 WLGPKYMRNKQPFSCRGILVVYNLGLTLLSLYMFCELVTVGWEGKYNFFCQGTR-TAGES
mus_ELOVL5 WLGPKYMKNRQPFSCRGILQLYNLGLTLLSLYMFYELVTGVWEGKYNFFCQGTR-SAGES
rat_ELOVL5 WLGPKYMKNRQPFSCRGILVVYNLGLTLLSLYMFYELVTGVWEGKYNFFCQGTR-SAGES
bos_ELOVL5 WLGPKYMKTRQPFSCRGILVVYNLGLTLLSLYMFCELVTVGWEGQYNFFCQGTR-SGGEA
gallus_ELOVL5 WLGPKYMRNKQPFSCRGILVVYNLGLTLLSLYMFYELVTGVWEGGYNFYCQDTH-SGGEA
frog_ELOVL5 WRGPKYMQNRQPFVSCRSILVVYNLGLTLLSFYMFYELVTGVWEGGYNFFCQDTH-SGGDA
salmo_ELOVL5 WLGPKYMRHRQPFVSCQGLLVLYNLALTLLSFYMFYEMVSAVWQGGYNFYCQDTH-SAGET
human_ELOVL2 WLGNYMKNRPALSLRGIILTLYNLGITLLSAYMLAELIISTWEGGYNLQCQDLT-SAGEA
bos_ELOVL2 WLGNYMKNRPALSLRGIILTLYNLGITLLSAYMLAELIISTWEGGYNLQCQDLT-SAGEA
mus_ELOVL2 WLGNYMKNRPALSLRGIILTLYNLGITLLSAYMLVLELISWEGGYNLQCQNLND-SAGEG
rat_ELOVL2 WLGNYMKNRPALSLRGIILTLYNLGITLLSAYMLVLELISWEGGYNLQCQNLND-SAGEG
gallus_ELOVL2 WLGPKYMKNRQPFSLKAHLIVYNLGLTLLSLYMLIELIATWEGGYNLQCQNLH-SAGEA
frog_ELOVL2 WLGPKYMKDRPAFSLRGHLIVYNLGLTLLSFYMLIELIISTWQGAYNLQCQNLND-SAGEA
salmo_ELOVL2 YLGSKYMRNRPAFSLKGVLVQVNFVSTMLSLYMLVLELISATLSAGYRLQCQGLH-EAGEA
human_ELOVL4 WLGPKWMDREPFQMRVLVLIYVNFVGMVLLNLFIFRELFMGSYNAGYSYICQSVSDYSNNVH
mus_ELOVL4 WLGPKWMDREPFQMRVLVLIYVNFVGMVLLNLFIFRELFMGSYNAGYSYICQSVSDYSNDVN
rat_ELOVL4 WLGPKWMDREPFQMRVLVLIYVNFVGMVLLNLFIFRELFMGSYNAGYSYICQSVSDYSNDVN
bos_ELOVL4 WLGPKWMDREPFQMRVLVLIYVNFVGMVLLNLFIFRELFMGSYNAGYSYICQTVSDYSNDVH
gallus_ELOVL4 WLGPKWMDREPFQMRVLVLIYVNFVGMVLLNLFIFRELFMGSYNAGYSYICQTVSDYSNDVY
frog_ELOVL4 WLGPFVFMKNREPFRLRYLLIAYNFGMVLNLFIFKELFLGAKAAGYSYICQTVSDYSDDEN
salmo_ELOVL4 WLGPKYMQNREPFQKTLIVYVNFVSMVIFNFFICKELFLAARAAGYSYICQSVSDYSDDPN
: * * * : : . : * * * : : : : : : : * * * .
```

```
human_ELOVL5 DMKIIRVLWYYYFSKLIIEFMDTFFFILRKNNHQITVLHVYHHASMLNIWWFVMMNWVPCGH
mus_ELOVL5 DMKIIRVLWYYYFSKLIIEFMDTFFFILRKNNHQITVLHVYHHATMLNIWWFVMMNWVPCGH
rat_ELOVL5 DMKIIRVLWYYYFSKLIIEFMDTFFFILRKNNHQITVLHVYHHATMLNIWWFVMMNWVPCGH
bos_ELOVL5 DMKIIRVLWYYYFSKLIIEFMDTFFFILRKNNHQITVLHVYHHASMLNIWWFVMMNWVPCGH
gallus_ELOVL5 DMKIIRVLWYYYFSKLIIEFMDTFFFILRKNNHQITVLHVYHHATMLNIWWFVMMNWVPCGH
frog_ELOVL5 DTKIIRVLWYYYFSKLIIEFMDTFFFILRKNNHQITVLHVYHHASMLNIWWFVMMNWVPCGH
salmo_ELOVL5 DTKIINVLWYYYFSKVIIEFMDTFFFILRKNNHQITFLHVIYHHASMLNIWWFVMMNWVPCGH
human_ELOVL2 DIRVAKVLWYYYFSKSVIEFLDTIFFVLRKKTSSQITFLHVYHHASMFNIWWCVLNIWPCGQ
bos_ELOVL2 DIRVAKVLWYYYFSKLIIEFLDTIFFVLRKKTSSQITFLHVYHHASMFNIWWCVLNIWPCGQ
mus_ELOVL2 DVRVAKVLWYYYFSKLVIEFLDTIFFVLRKKTSSQITFLHVYHHASMFNIWWCVLNIWPCGQ
rat_ELOVL2 DIRVAKVLWYYYFSKLVIEFLDTIFFVLRKKTSSQITFLHVYHHASMFNIWWCVLNIWPCGQ
gallus_ELOVL2 DIRVAKVLWYYYFSKVIIEFADTIFVLRKKTSSQITFLHVYHHATMFNIWWCVLNIWPCGQ
frog_ELOVL2 DVRVAKVLWYYYFSKAIIEFMDTIFVLRKKTSSQITFLHVYHHATMFNIWWCVLNIWPCGQ
salmo_ELOVL2 DLRVAKVLWYYYFSKVIIEFLDTIFFVLRKKTSSQITFLHVYHHASMFNIWWCVLNIWPCGQ
human_ELOVL4 EVRIAAALWYFVSKGVEYLDTVFFILRKNNHQVSLHVYHHCTMFTLWVIGIKWVAGGQ
mus_ELOVL4 EVRIAGALWYFVSKGVEYLDTVFFILRKNNHQVSLHVYHHCTMFTLWVIGIKWVAGGQ
```

# Spinocerebellar ataxia 38: structure-function analysis shows ELOVL5 G230V is proteotoxic, conformationally altered and a mutational hotspot

Ferrero et al.

```
rat_ELOVL4      EVRIAAALWVYFVSKGVEYLDTVFFILRKKNNQVVSFLHVVHCTMFTLWWIGIKWVAGGQ
bos_ELOVL4      EVRIAAALWVYFISKGIEYLDTVFFILRKKNNQVVSFLHVVHCTMFTLWWIGIKWVAGGQ
gallus_ELOVL4   EVRIAAALWVYVSKGIEYLDTVFFILRKKFNQISFLHVVHCTMFTLWWIGIKWVAGGQ
frog_ELOVL4     EVRVASALWVYVSKGVEYFDTVFFILRKKFNQISFLHVVHCTMFTLWWIGIKWVAGGQ
salmo_ELOVL4    EVRIAAALWVYFISKGVEYLDTVFFILRKKFNQVVSFLHVVHCTMFTLWWIGIKWVAGGQ
: : : .****:.* * : * : **.*:*** : * : .**:* ** : * : . * :
: : : .****:.* * : * : **.*:*** : * : .**:* ** : * : . * :

human_ELOVL5    SYFGATLNSFIHVLMSYYGLSSV-PSMRPYLWKKYITQGQLLQFVLTIIQTSCGVIWP
mus_ELOV5       SYFGATLNSFIHVLMSYYGLSSI-PSMRPYLWKKYITQGQLVQFVLTIIQTTCGVFWP
rat_ELOVL5      SYFGATLNSFIHVLMSYYGLSSV-PSMRPYLWKKYITQGQLVQFVLTIIQTSCGVIWP
bos_ELOVL5      SYFGATLNSFIHVLMSYYGLSSV-PSMRPYLWKKYITQGQLVQFVLTIIQTSCGVIWP
gallus_ELOVL5   SYFGATLNSFIHVLMSYYGLSAV-PAIRPYLWKKYITQGQLIQFVLTIFQTSAGVWP
frog_ELOVL5     SFFGATLNSFIHVLMSYYGLSAI-PAIRPYLWKKYITQCQLTQFVLTMTQTTCAMIWP
salmo_ELOVL5    SYFGASLNSFVHVLMSYYGLSAV-PAIRPYLWKKYITQGQLIQFVLTMSQTICAVIWP
human_ELOVL2    SFFGPTLNSFIHILMSYYGLSVF-PSMHKYLWKKYLTQAQLVQFVLTITHTMSAVVKP
bos_ELOVL2      SFFGPTLNSFIHILMSYYGLSVF-PSMHKYLWKKYLTQAQLVQFVLTITHTMSAVVRP
mus_ELOVL2      SFFGPTLNSFIHILMSYYGLSVF-PSMHKYLWKKYLTQAQLVQFVLTITHTLSAVVKP
rat_ELOVL2      SFFGPTLNSFIHILMSYYGLSVF-PSMHRYLWKKYLTQAQLVQFVLTITHTLSAVVKP
gallus_ELOVL2   SFFGPTLNSFIHVLMSYYGLSVI-PSMRKYLWKKYLTQAQLIQFVLTIVHTLSAAVKP
frog_ELOVL2     SFFGPTLNSFIHVLMSYYGLSVI-PSMHKYLWKKYLTQAQLVQFVLTITHTLSAAVKP
salmo_ELOVL2    SFFGPTLNSFIHVCMSYYGLSTI-PSMQKYLWKKRYLTQAQLIQFILTITHTLSAIVVP
human_ELOVL4    AFFGAQLNSFIHVIMSYYGTLAFGPWIQKYLWKKRYLTMLQLIQFHVITIGHTALSLYTD
mus_ELOVL4      AFFGAQMNSFIHVIMSYYGTLAFGPWIQKYLWKKRYLTMLQLVQFHVITIGHTALSLYTD
rat_ELOVL4      AFFGAQMNSFIHVIMSYYGTLAFGPWIQKYLWKKRYLTMLQLVQFHVITIGHTALSLYTD
bos_ELOVL4      AFFGAQLNSFIHVIMSYYGTLAFGPWIQKYLWKKRYLTMLQLVQFHVITIGHTALSLYTD
gallus_ELOVL4   AFFGAQMNAFIHVIMMYGTLAACGPKVQKYLWKKRYLTILQLVQFHVITIGHTALSIIYD
frog_ELOVL4     SFFGAHMNALIHVVMYLYYGLAACGPHLQKYLWKKRYLTILQLVQFHVITIGHTALSIIYD
salmo_ELOVL4    SFFGAHMNAIHLVLMYLYYGLASFGPKIQKYLWKKRYLTIVIQMVQFHVITIGHTALSIIYD
: : * . : * : : * : * * : * : * : * : * : * : * : * : * : * : * :

human_ELOVL5    CTFPLGWLFFQIGYMISLIALFTNFYIQT---NKKGASRRKDHLDKDHQNGSMAAVNGH
mus_ELOV5       CSFPLGWLFFQIGYMISLIALFTNFYIQT---NKKGASRRKDHLDKDHQNGSVAAVNGH
rat_ELOVL5      CSFPLGWLFFQIGYMISLIALFTNFYIQT---NKKGASRRKEHLKDHQNGSMTAVNGH
bos_ELOVL5      CTFPLGWLFFQIGYMISLITLFTNFYIQT---NKKGVSRREHDKDHQNGSVAAVNGH
gallus_ELOVL5   CAFPGWLFFQIFYMISLILFTNFYIQT---NKKASSRKE---YQNGSTATVNGY
frog_ELOVL5     CKFPMGWLFFQNSYMISLILFTNFYIQT---NKKTSRREHDKDHQNGSVAAVNGY
salmo_ELOVL5    CGFPRGWLFFQIFYMASLIAFFSNFYIQT---KKHRVSQKEY---HQNGSVDSLNGH
human_ELOVL2    CGFPFGCLIFQSSYMLTLVILFVNFYIQT---RKKPMKKDMQ---EPPAGKEVKNGF
bos_ELOVL2      CGFPFGCLIFQSSYMLTLVILFVNFYIQT---RKKPMKKAME---E--AGKEVKNGF
mus_ELOVL2      CGFPFGCLIFQSSYMLTLVILFVNFYIQT---RKKPVKKELO---E---KEVKNGF
rat_ELOVL2      CGFPFGCLIFQSSYMLTLVILFVNFYIQT---RKKPMKKEMP---EGAAGKEVKNGF
gallus_ELOVL2   CGFPFGCLMFQSSYMATLVILFVNFYIQT---QKAPSRATAK---ETPVTTEVKNGY
frog_ELOVL2     CGFPFGCLMFQSSYMTLVILFVNFYIQT---KKRPSKSDPN---GIPVLTEMKNGY
salmo_ELOVL2    CGFPFGCLLFQFSYMATLVILFVNFYIQT---RKRREEE---SIKSSR
human_ELOVL4    CPFPKMHWALIAAISFIFLFNFYIRTY---KEPKKPKAGKT---AMNGISA--NGV
mus_ELOVL4      CPFPKMHWALIAAISFIFLFNFYIRTY---NEPKQSKTGKT---ATNGISS--NGV
rat_ELOVL4      CPFPKMHWALIAAISFIFLFNFYIRTY---NEPKKSKTGKT---ATNGISA--NGV
bos_ELOVL4      CPFPKMHWALIVYAVSFIFLFNFYVRTY---KEPKKAKPGKT---ATNGISA--NGV
gallus_ELOVL4   CPFPKMHWGVIFYAITFIFLFGNFYVRTY---KLPKEPVKNGK---IANGAVA--NGV
frog_ELOVL4     CPFPKMHWALIVYAITFIFLFGNFYVRTY---NAPKAATKSGKS---LTNGKTS-VNGK
salmo_ELOVL4    CEFPKMHYALICYALTFIALFGNFYVRTYRRTPRQPREPKASKA---LSNGVS---NGL
* * * * * * : : : * * * * * * . . .

human_ELOVL5    TNSFSPS-----ENNPKPRKLRK--D
mus_ELOV5       TNSFSPS-----ENSVKPRKQQRK--D
rat_ELOVL5      TNNFASL-----ENSVTSRKQQRK--D
bos_ELOVL5      ISSFSSL-----ENNPKPRKQQRK--D
gallus_ELOVL5   TNSFSSL-----ENNPKQQRKQQRK--D
frog_ELOVL5     TNSFSSL-----EDNVKQQRKQQRK--N
salmo_ELOVL5    ANGVTPT-----E-TITHRKRVRV--D
human_ELOVL2    SKAYFTA-----ANGVMNKKQAQ----
bos_ELOVL2      SKAYFST-----ANGVISKKAQ----
mus_ELOVL2      PKAHLIV-----ANGMTDKKAQ----
rat_ELOVL2      PKAHSIA-----ANGVTDKKVQ----
gallus_ELOVL2   HKNYFAA-----SNGFLSNKKAQ----
```



**Spinocerebellar ataxia 38: structure-function analysis shows ELOVL5 G230V is proteotoxic, conformationally altered and a mutational hotspot**

*Ferrero et al.*

```
frog_ELOVL2      HKDLINA-----SNGVLHKKEQ----
salmo_ELOVL2    PNGHSVS-----TNGTSFKKRK----
human_ELOVL4    SKSEKQLMI-----ENGKKQKNGKAKGD
mus_ELOVL4      NKSEKAL-----ENGKPKQKNGKPKGE
rat_ELOVL4      NKSEKQLVL-----ENGKPKQKNGKPKGE
bos_ELOVL4      NKSENHLVV-----ENGKKQKNGKAKGE
gallus_ELOVL4   SKPENNPVV-----ENGKKQKKGKAKGE
frog_ELOVL4     SSMNGKSPVNGKSMNGKSLMNGAVNGAVSKQDYKVGQENGRKRRKGRAKRE
salmo_ELOVL4    SKGLGNGAVVGGGKVEEKERSSGVDN-----GNRRRKRKGRAKRD
```
